# Supplementary material for: STRA6 is essential for induction of vascular smooth muscle lineages in human embryonic cardiac outflow tract development
Source: PubMed Central journal article supplement — Cardiovasc Res. 2023 Jan 13;119(5):1202–17. doi: 10.1093/cvr/cvad010 (PMC10202647; doi:10.1093/cvr/cvad010), 2023-01-13
Supplement: cvad010_supplementary_data.pdf [file cvad010_supplementary_data.pdf]

**STRA6 Is Essential for Induction of Vascular Smooth Muscle Lineages in Human Embryonic  
Cardiac Outflow Tract Development**

1

2 **Chikai Zhou, Timm Häneke, Eduarde Rohner, Jesper Sohlmér, Polina Kameneva, Artem**  
3 **Artemov, Igor Adameyko, Makoto Sahara**

4

5

6 **\* Correspondence:**

7 Makoto Sahara ([makoto.sahara@ki.se](mailto:makoto.sahara@ki.se))

8

9 **A short title:** STRA6 is essential for SMCs in cardiac OFT

10

11

**A**

E10.5 embryo

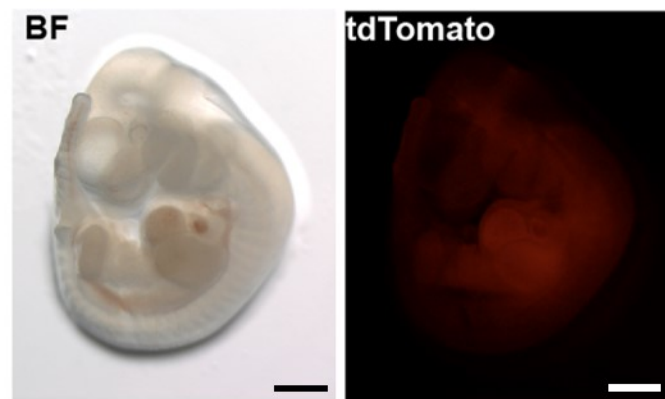

Neonatal P1 heart

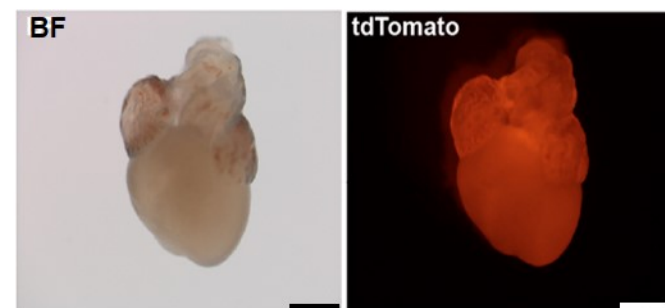**B**

Tail

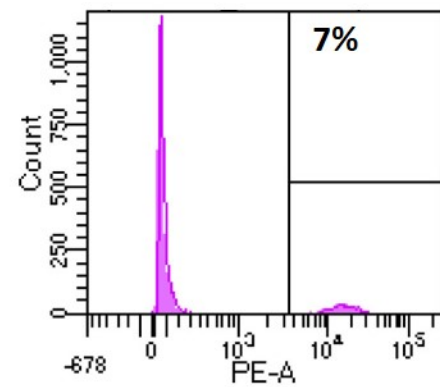

Heart

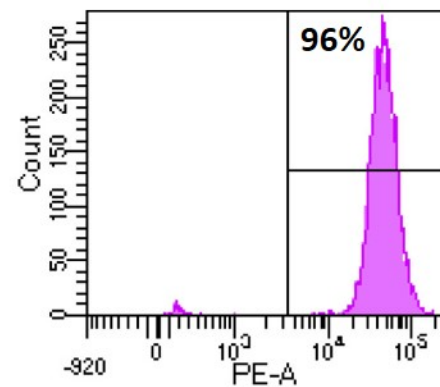**Figure S1**

12 **Supplementary Figure legends**

13 **Figure S1. *Mesp1*<sup>+</sup> lineage tracing in murine embryonic hearts.**

14 (A) Macroscopic images showing the tdTomato expression patterns in the *Mesp1*<sup>Cre/+</sup>; *Rosa26*<sup>tdTomato</sup>  
15 embryo on E10.5 (top) and in the neonatal P1 heart (bottom) of the *Mesp1*<sup>Cre/+</sup>; *Rosa26*<sup>tdTomato</sup> mouse.

16 Scale bars, 1 mm. BF, bright field. (B) Flow cytometry analysis showing the percent of *Mesp1*-  
17 tdTomato-positive cells in the tail (top) and heart (bottom) of the *Mesp1*<sup>Cre/+</sup>; *Rosa26*<sup>tdTomato</sup> mouse.

18

19

# Human STRA6 locus

## Exon 2

ATG

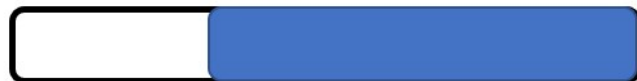

**WT** CAG AGA **ATG** TCG TCC CAG CCA GCA **GGG** **AAC** CAG ACC TCC CCC **GGG** **GCC** ACA GAG  
M S S Q P A G N Q T S P G A T E

**KO Clone** CAG AGA ATG TCG TCC CAG CCA GCA **GGG** **AAC** CAG ACC TCC CC- **GGG** **GCC** ACA GAG -1bp  
CAG AGA ATG TCG TCC CAG CCA GCA **GGG** **AAC** CAG ACC TCC CC- --- --- ACA GAG -7bp

Frameshift

**Figure S2**

20 **Figure S2. Generation of the *STRA6*-KO hESC line by CRISPR-Cas9.**

21 The top row shows a wild-type sequence of the region in the second exon of the human *STRA6* gene.

22 The red sequence represents the target sequence of the sgRNA (*Materials and Methods*), and the blue

23 sequence represents the protospacer adjacent motif (PAM). Sequences on the bottom row are

24 highlighting frameshift mutations of the sgRNA-targeted region in both alleles of the mutated clone.

25 Within the sequences, deletions are indicated by dashed lines.

26

27



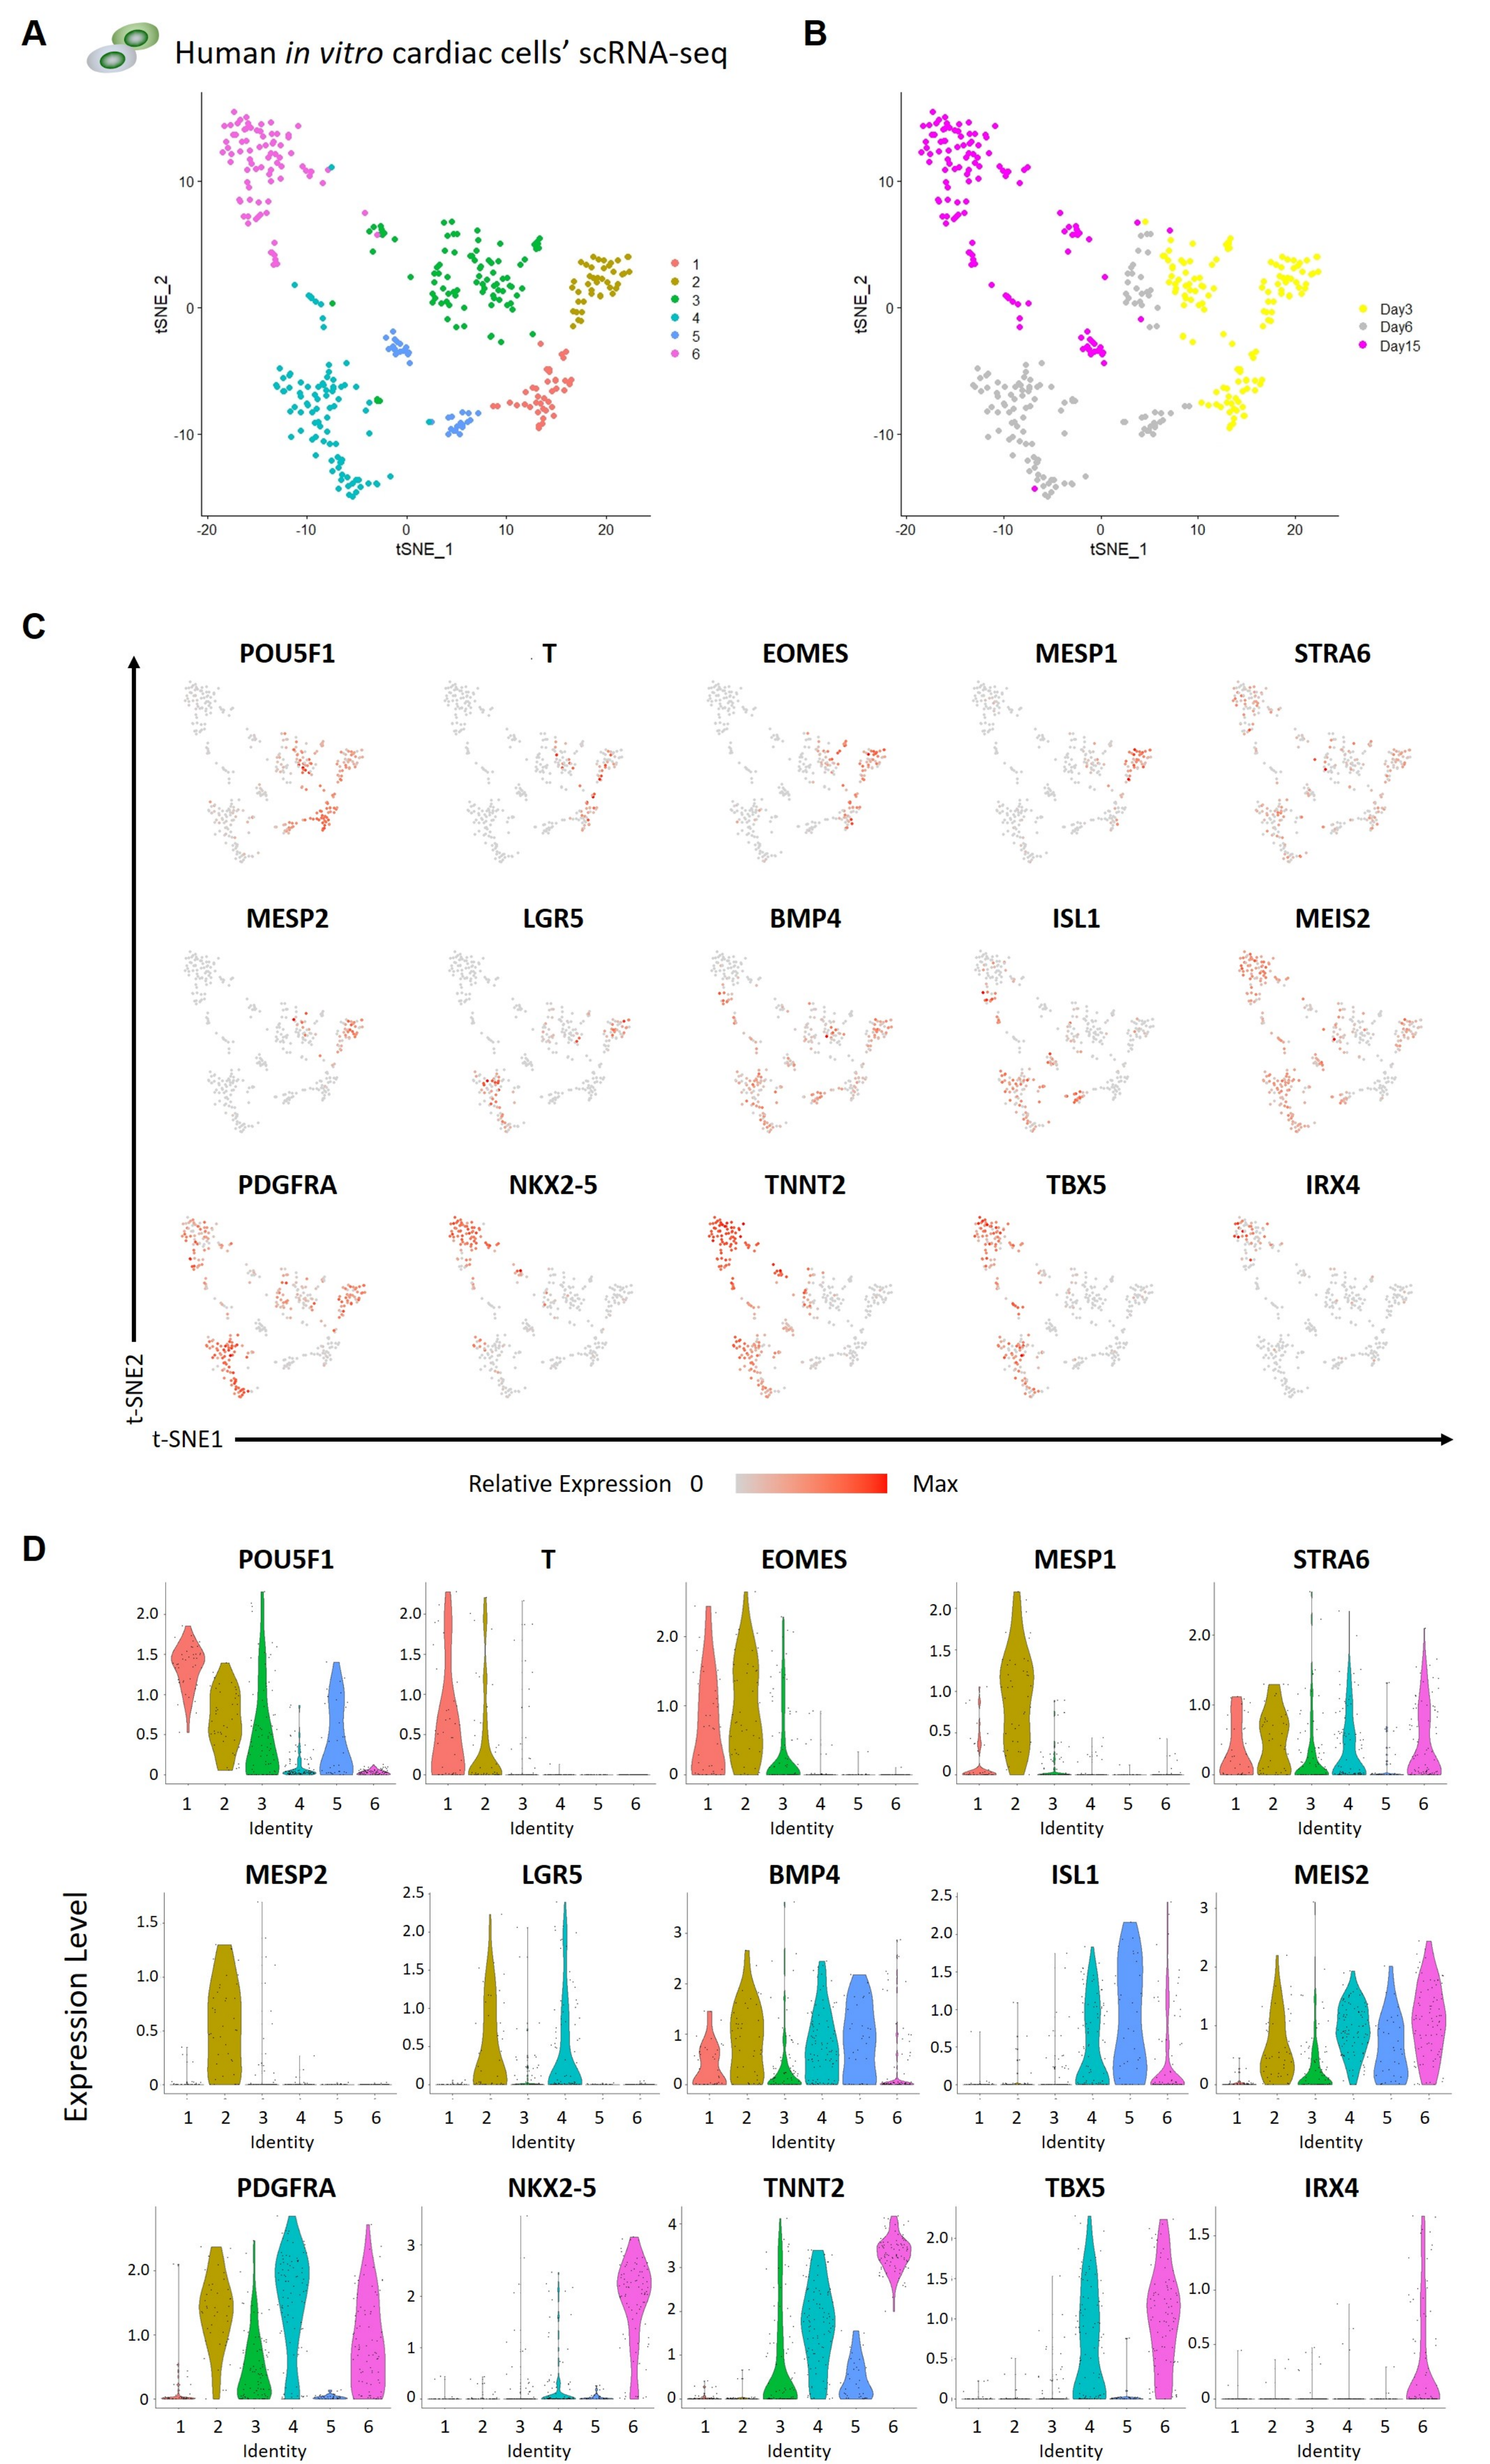

**Figure S3**

28 **Figure S3. Single-cell RNA-seq analysis of *in vitro* hESC-derived cells during CM differentiation.**  
29 (A) The tSNE analysis using the single-cell RNA-seq dataset, which was obtained from *in vitro* hESC-  
30 derived cells during CM differentiation (day 3 to 15),<sup>16</sup> segregated 366 individual cells into 6 clusters.  
31 (B) The same tSNE plots in (A), showing days when the cells were harvested. (C) Feature plots of the  
32 cardiac developmental markers, including the pluripotency/early mesoderm/SHF/pan-  
33 cardiac/FHF/developing CM marker genes, respectively, with *STRA6* on the tSNE plots in (A). (D)  
34 Violin plots of the same genes as in (C), in the segregated 6 clusters of the *in vitro* hESC-derived cells.  
35 As shown in (C) and (D), *Mesp1* was entirely expressed in cells of the cluster #2, which was thereby  
36 termed as “*Mesp1*+ cardiac precursors”. The majority ( $\approx 60\%$ ) of cells in the cluster #2 also expressed  
37 *STRA6*.

38

39



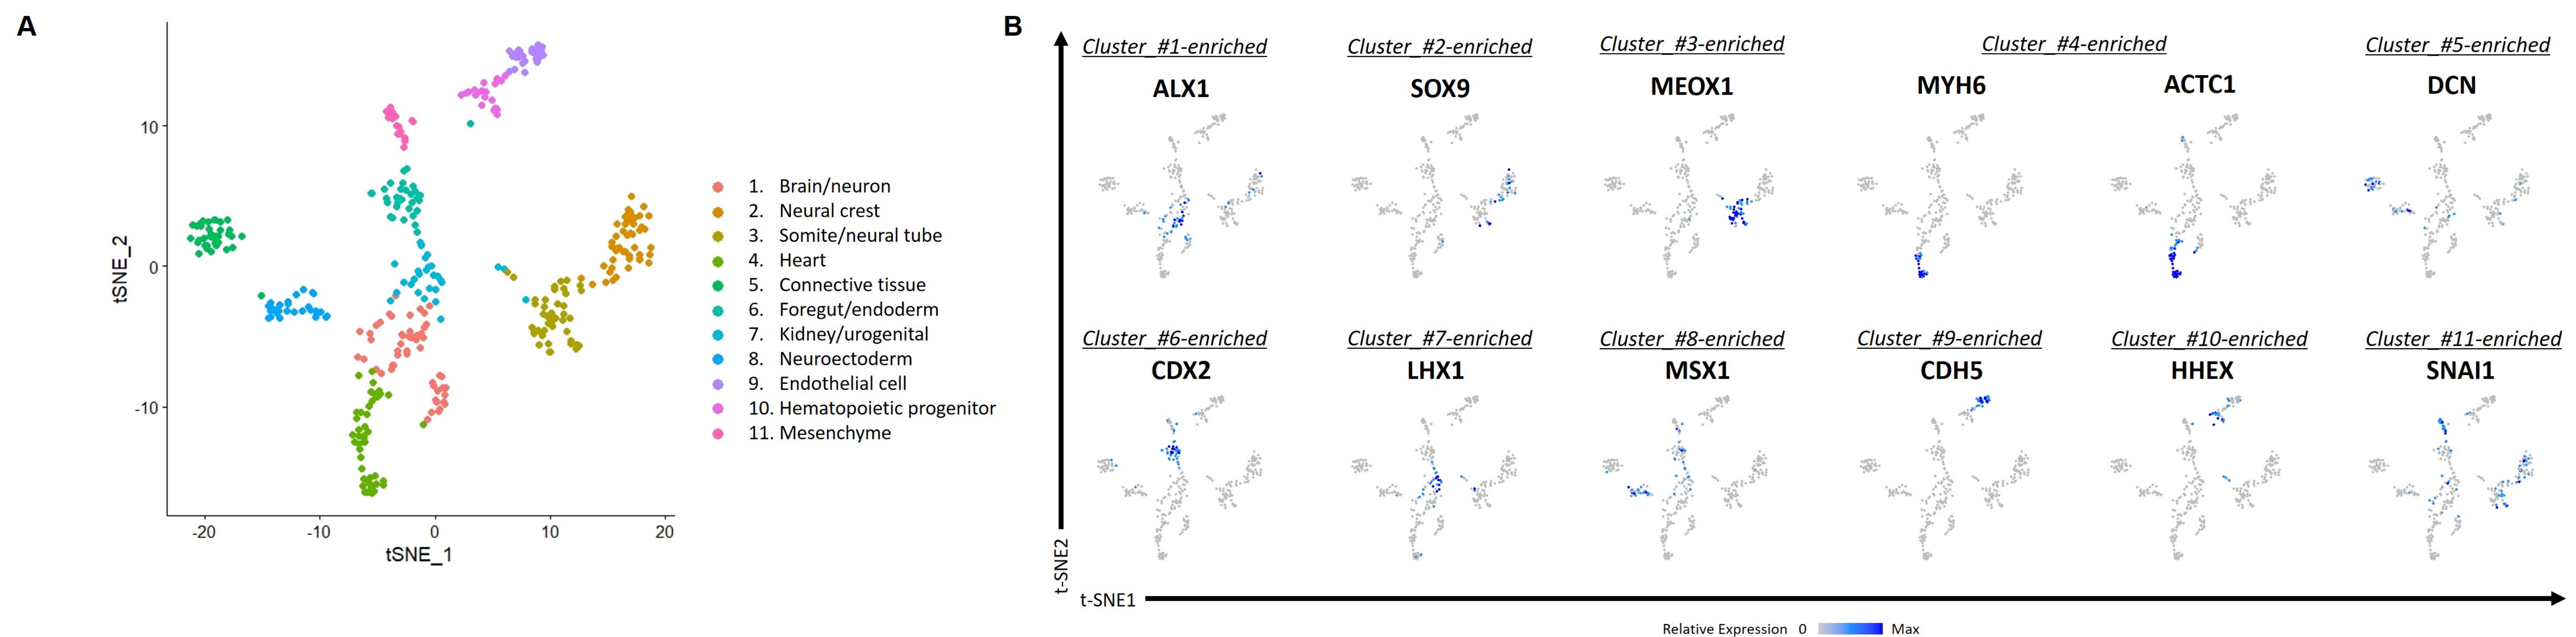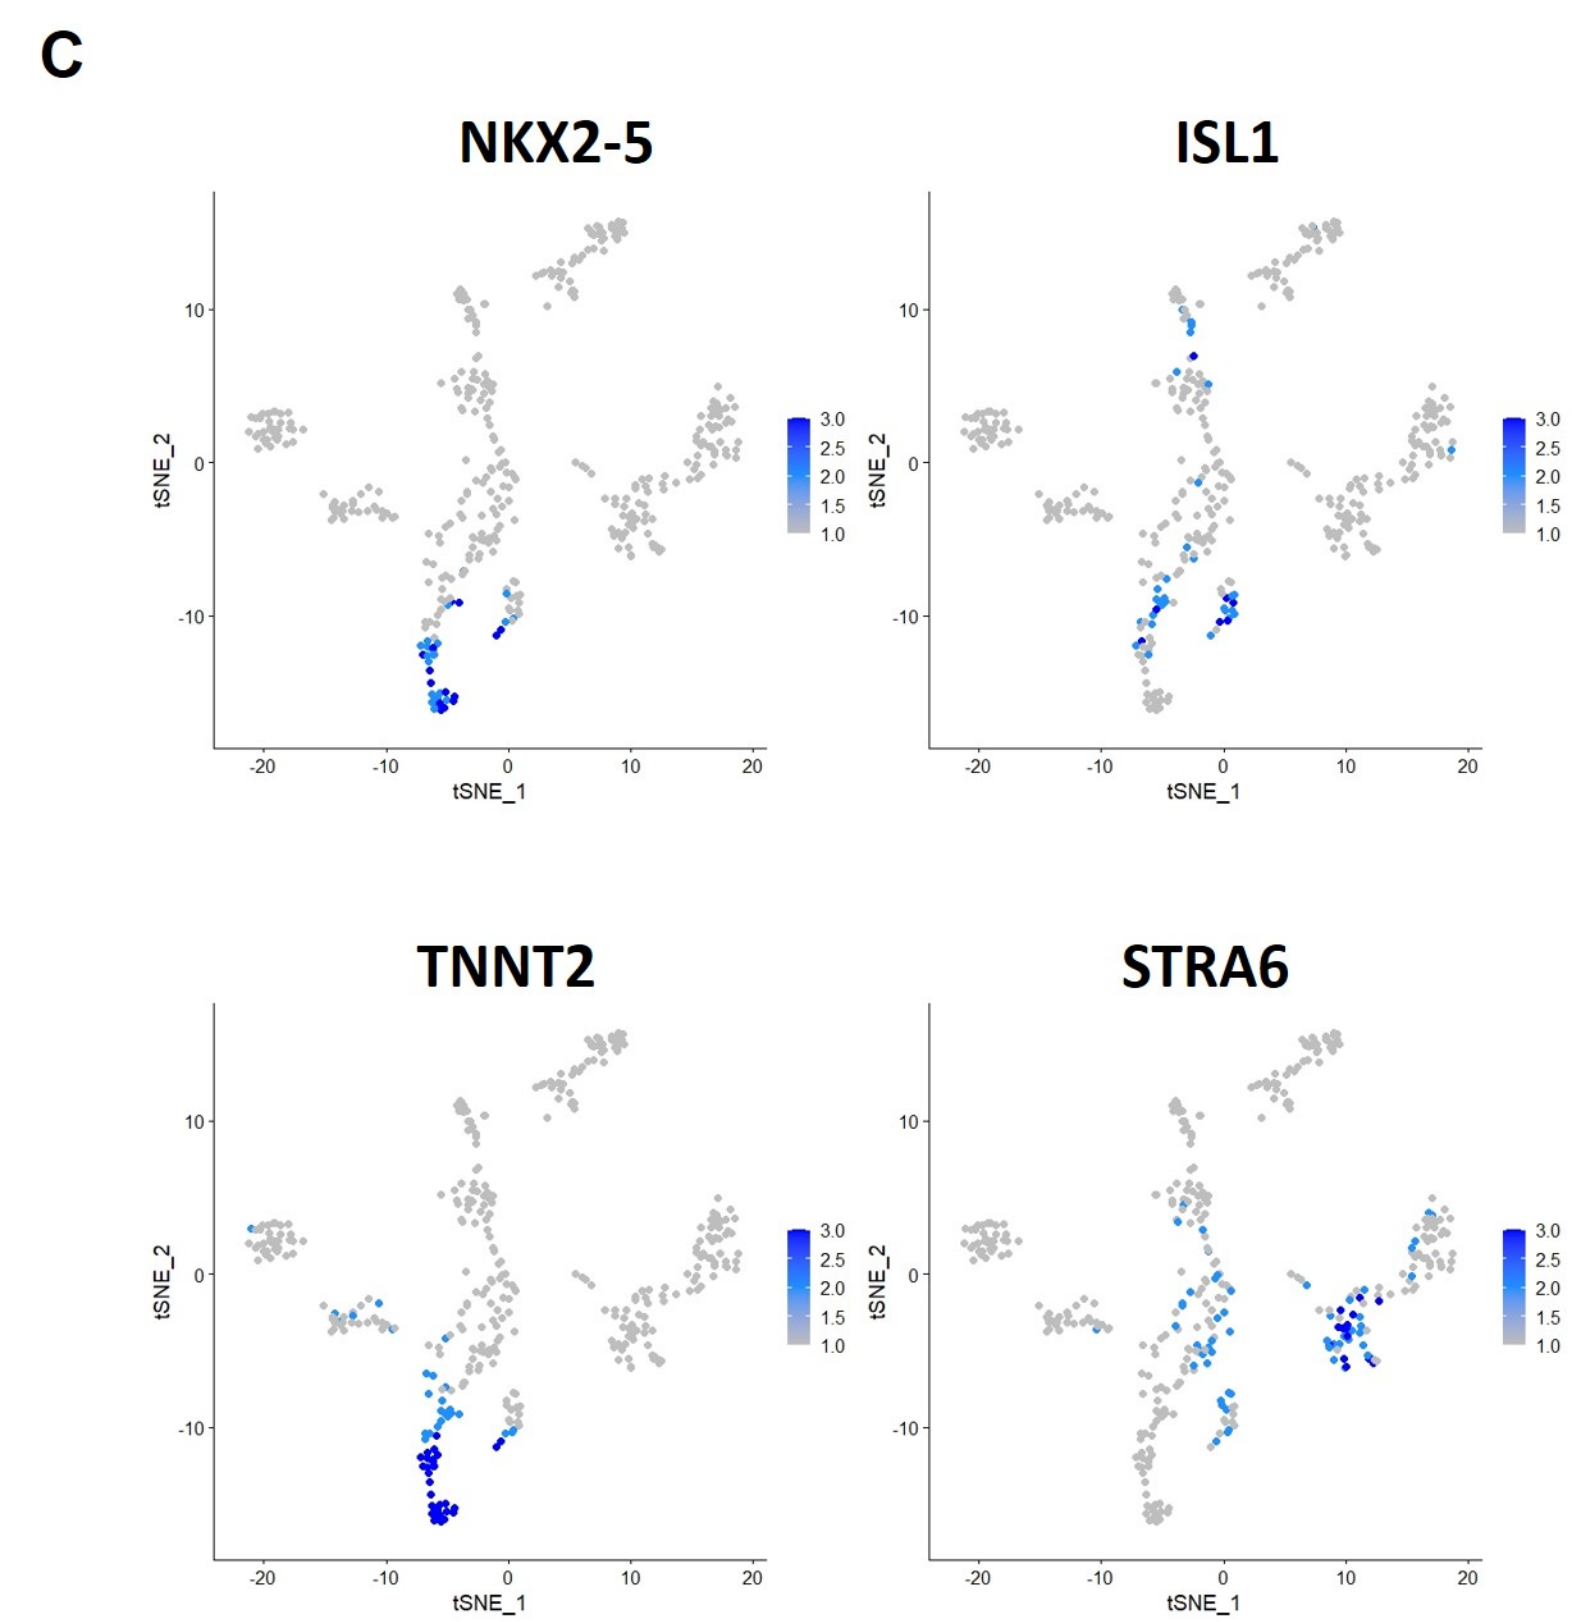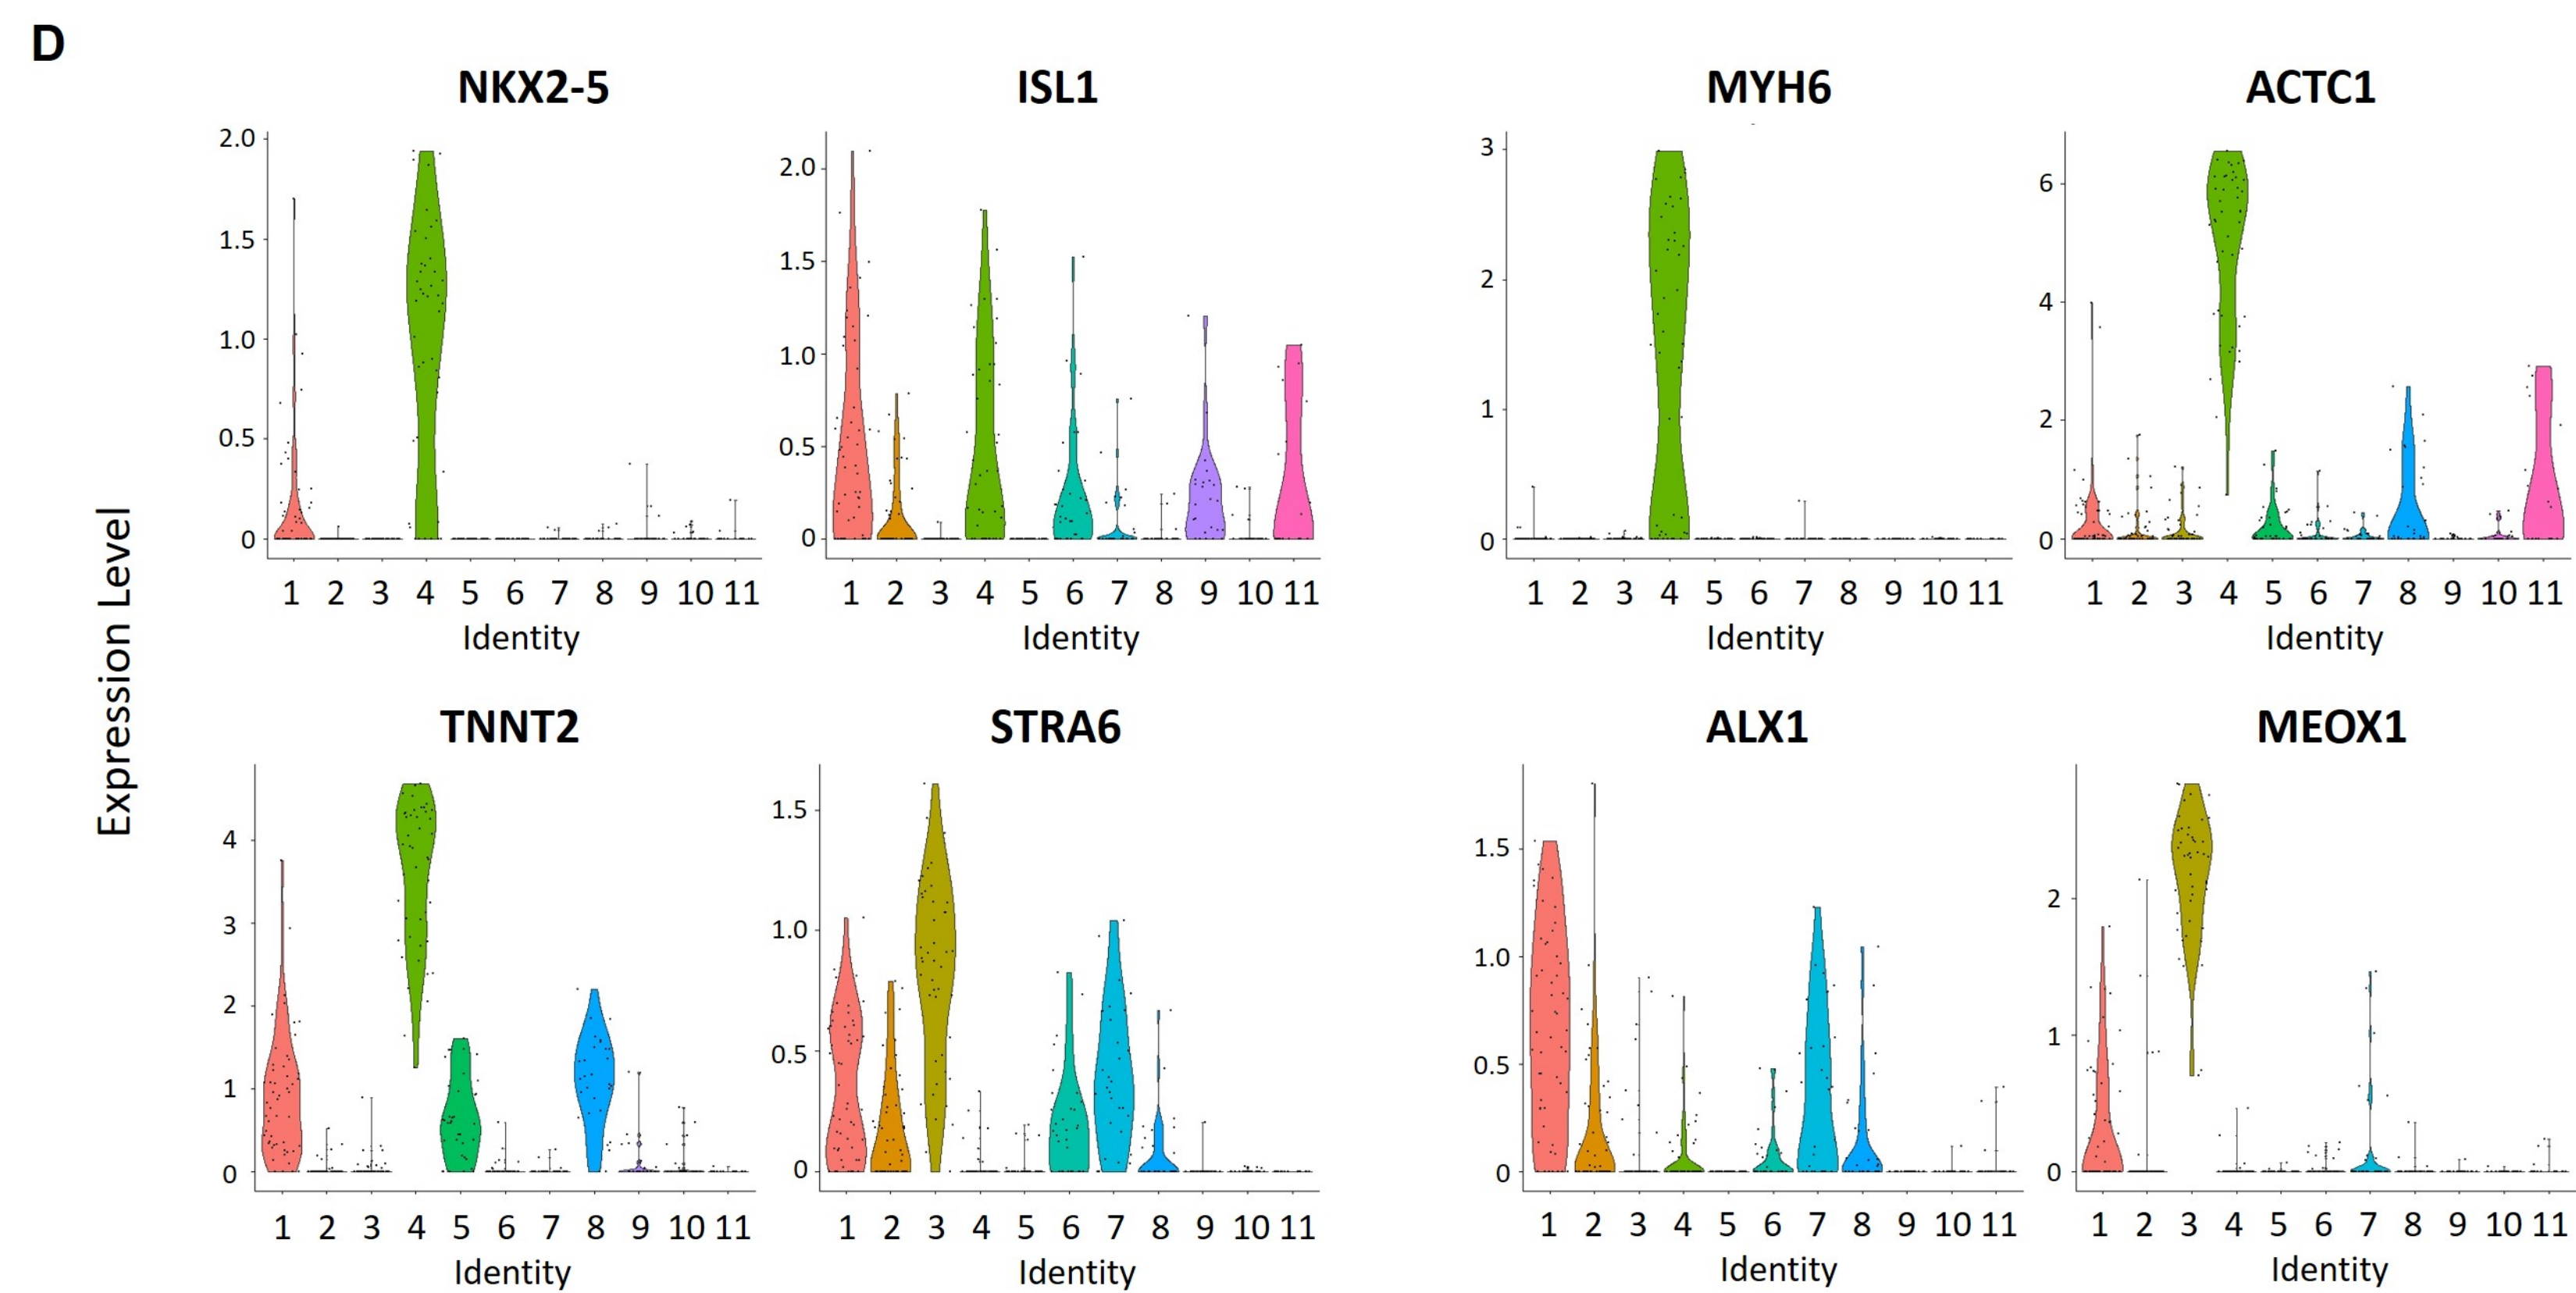

**Figure S4**



40 **Figure S4. Single-cell RNA-seq analysis of murine whole embryo-derived Mesp1<sup>+</sup> lineage cells at**  
41 **E8.25.**

42 (A) The tSNE analysis segregated a total of 768 single Mesp1<sup>+</sup> cells, obtained from murine whole  
43 embryos (*Mesp1*<sup>Cre/+</sup>; *Rosa26*<sup>tdTomato</sup>) at E8.25, into 11 clusters including the heart (cluster #4). (B)  
44 Feature plots of each cluster-specific genes on the tSNE plots in (A). (C) Feature plots of the SHF/pan-  
45 cardiac/CM marker genes with *STRA6* on the tSNE plots in (A). (D) Violin plots of the same genes as  
46 in (C) and of several genes appearing in (B), in the segregated 11 clusters of the Mesp1<sup>+</sup> lineage cells  
47 of murine whole embryos at E8.25.

48

49

**A**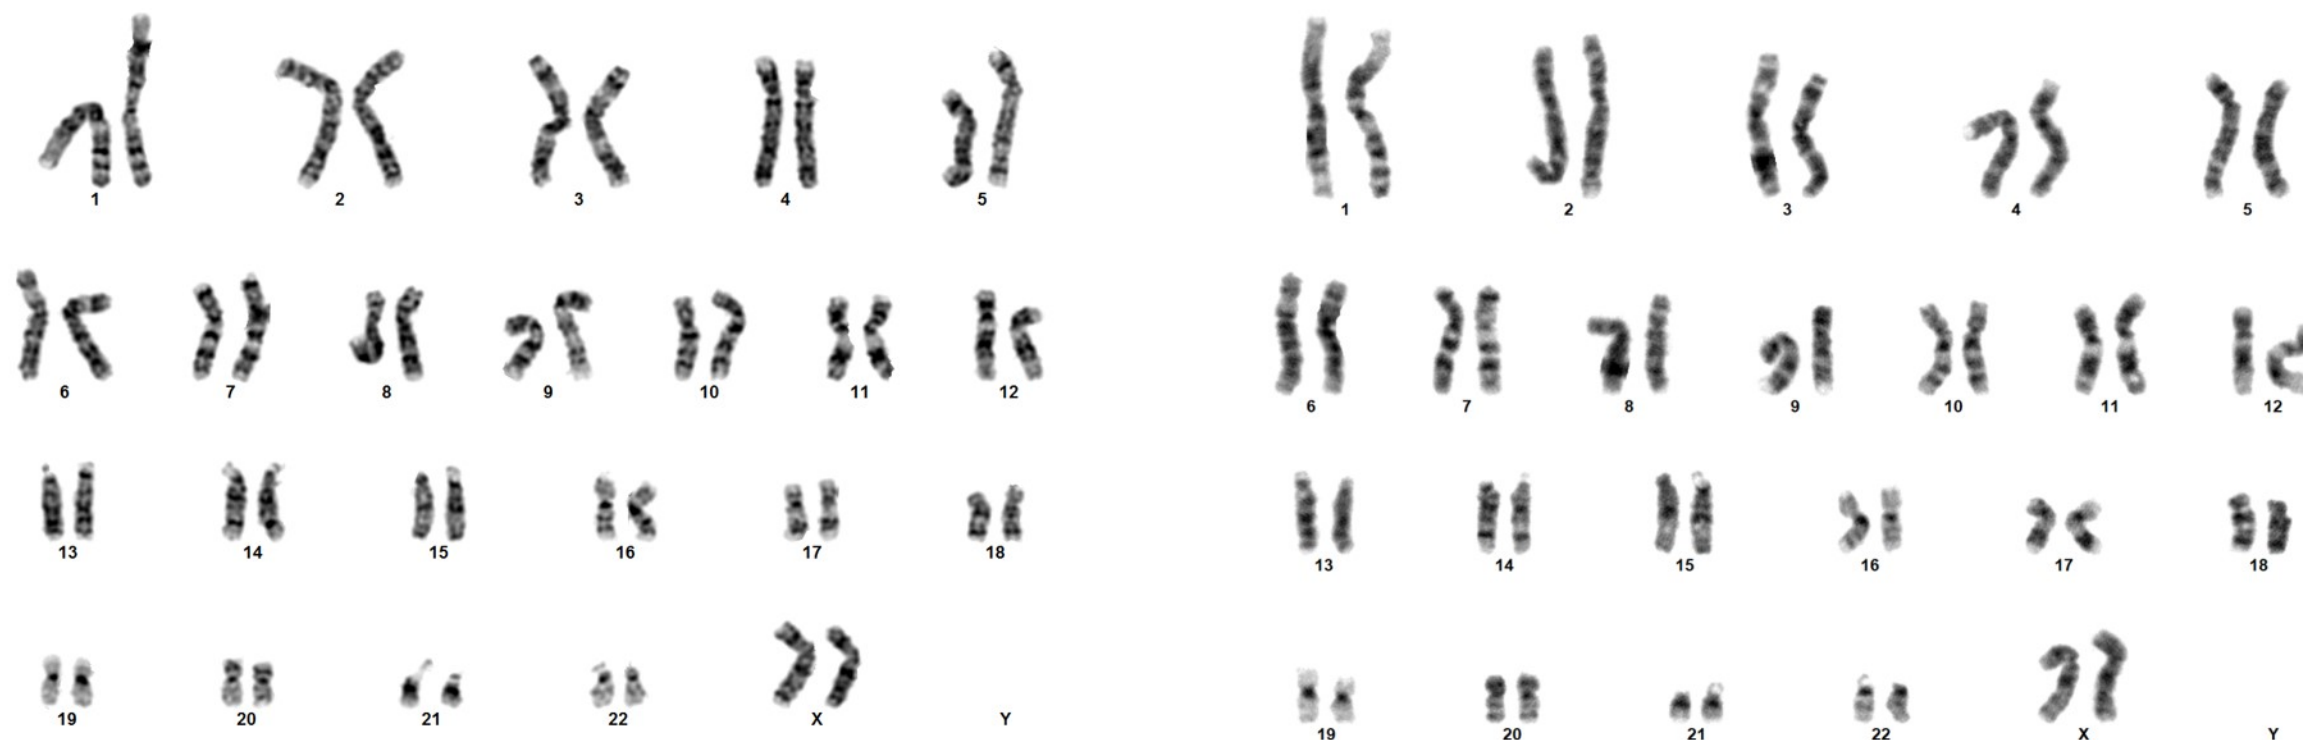

Wild-type hESC : 46, XX

STRA6-KO hESC : 46, XX

**B**

□ Target sequence: **AGGGAACCAGACCTCCCCGGGG** (chr15:74202228)

| Location        | Number of mismatches | Sequence (including mismatches)                    |
|-----------------|----------------------|----------------------------------------------------|
| chr10:132469417 | 3                    | CCACGGGGG <b>tgGGg</b> CTGGTTCCT                   |
| chr2:24203665   | 3                    | A <b>cGGAc</b> CCAGACCTCCCC <b>g</b> GTGG          |
| chr2:65056892   | 3                    | CCCCGGGGGAGGTC <b>act</b> TTCCCT                   |
| chr2:109184449  | 3                    | CC <b>ct</b> GGGGGAG <b>c</b> TCTGGT <b>c</b> CCCT |
| chr5:10462433   | 3                    | AGGGAG <b>gCCc</b> GACCT <b>ct</b> CCCGTGG         |
| chr7:98223587   | 3                    | AGGGAACCAGAG <b>g</b> CTCCCT <b>Ca</b> AGG         |

**Figure S5**

50 **Figure S5. Karyotyping and off-target analysis of the generated *STRA6*-KO hESC line.**

51 (A) G-banding chromosomal analysis (Cell Guidance Systems) showing a normal karyotype for both  
52 the WT and generated *STRA6*-KO hESC lines. (B) The off-target analysis for the sgRNA used for  
53 generation of the *STRA6*-KO hESC line (Supplementary material online, *Figure S2*) found 6 putative  
54 off-target sites that had the highest similarity with three base pair mismatches to the target sequence of  
55 the sgRNA. The PAM of the target sequence is highlighted in blue. The mismatched nucleotides are  
56 shown in red. PCR amplified these potential off-target sites using DNA extracted from the established  
57 *STRA6*-KO hESC line, followed by Sanger sequencing, which showed no mutations on these regions.

58

59



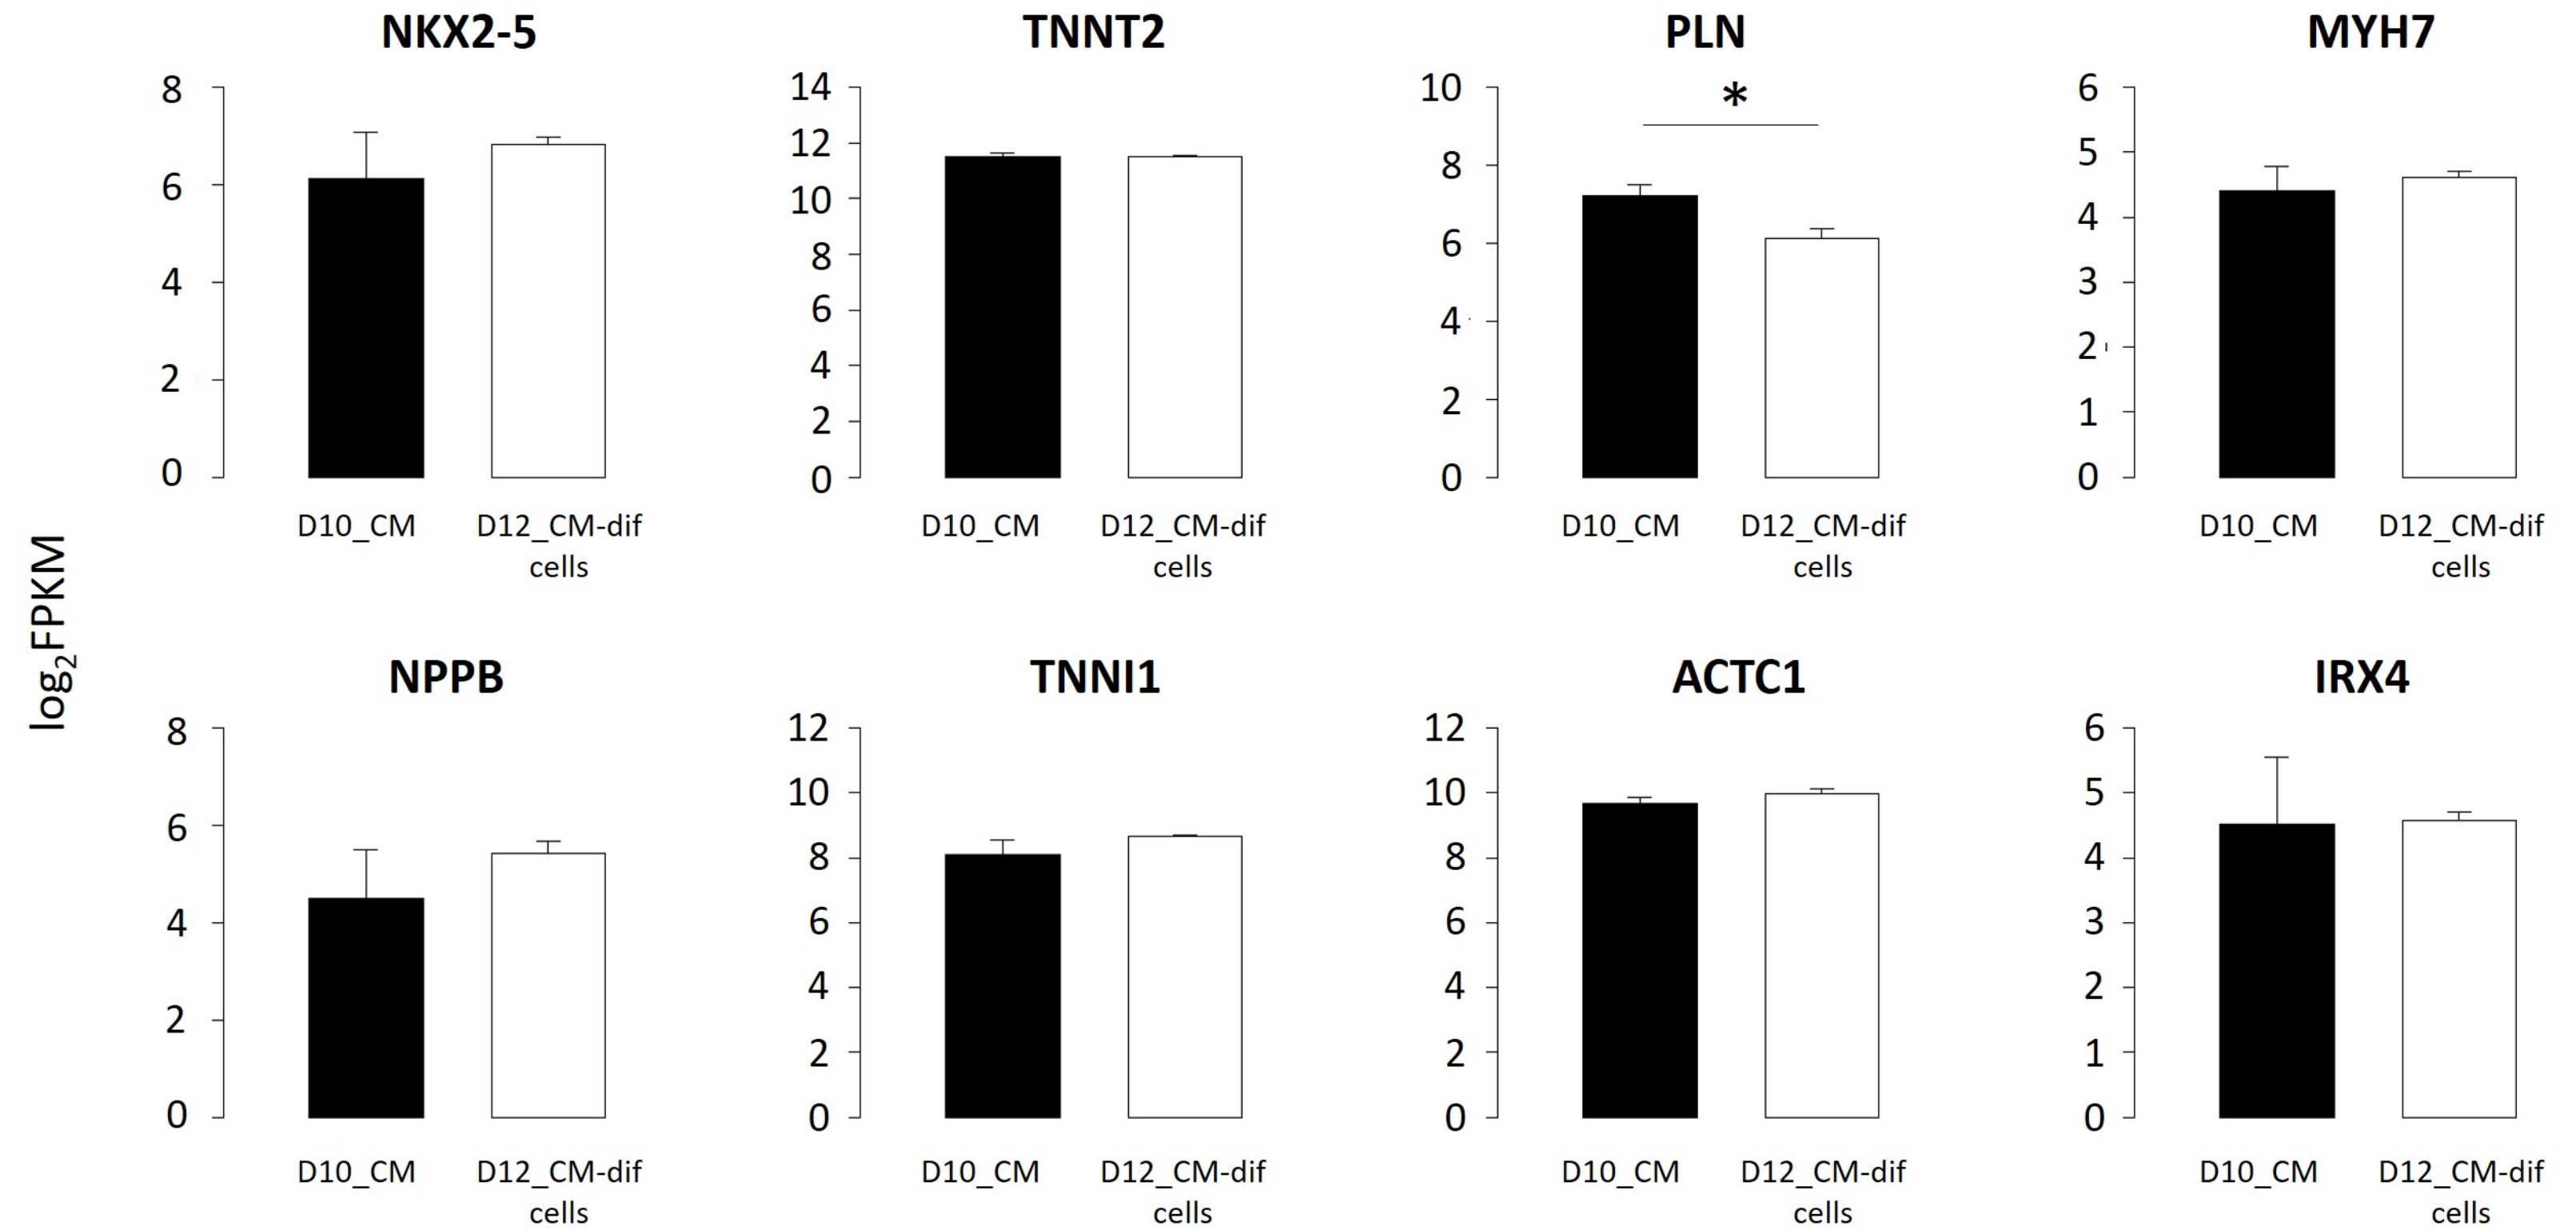

**Figure S6**

60 **Figure S6. Comparison of representative CM marker genes' expression between WT cells on day**  
61 **12 and FACS-purified CMs on day 10 in CM differentiation.**

62 Population RNA-seq data of WT cells on day 12 in CM differentiation (around 80% TNNT2<sup>+</sup>) were  
63 compared with those of the previously obtained WT ISL1<sup>-</sup>TNNT2<sup>+</sup> cells (i.e., differentiated CMs)  
64 purified by FACS on day 10 in CM differentiation.<sup>16</sup> Comparison of representative CM marker genes'  
65 expression is shown. \* $P < 0.05$ . Differences between groups were examined with Student's *t*-test.

66

67

**A**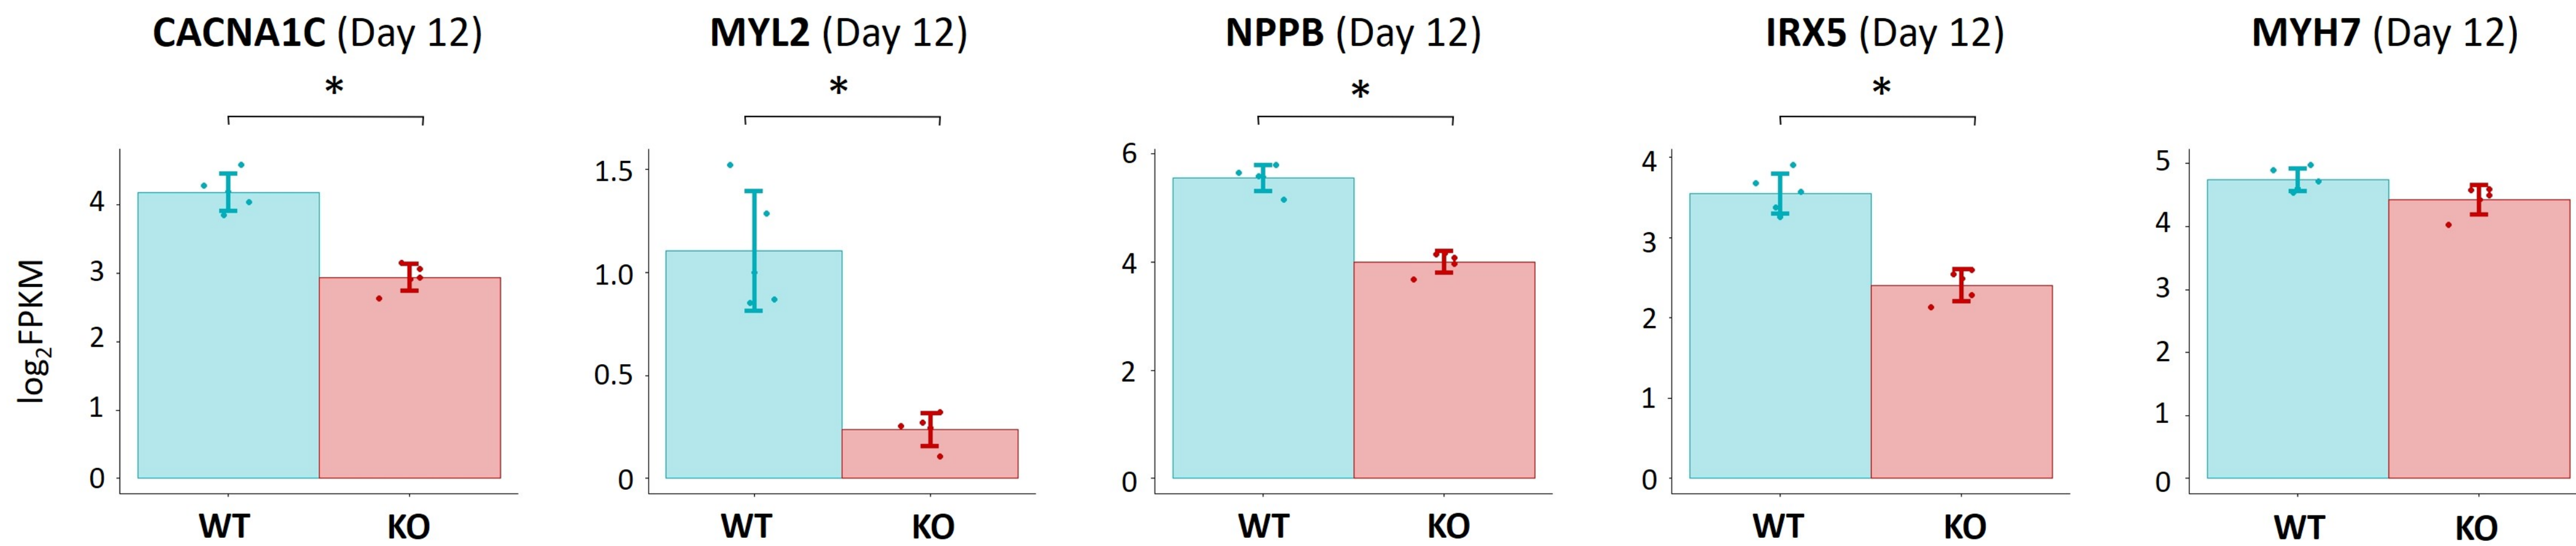**B**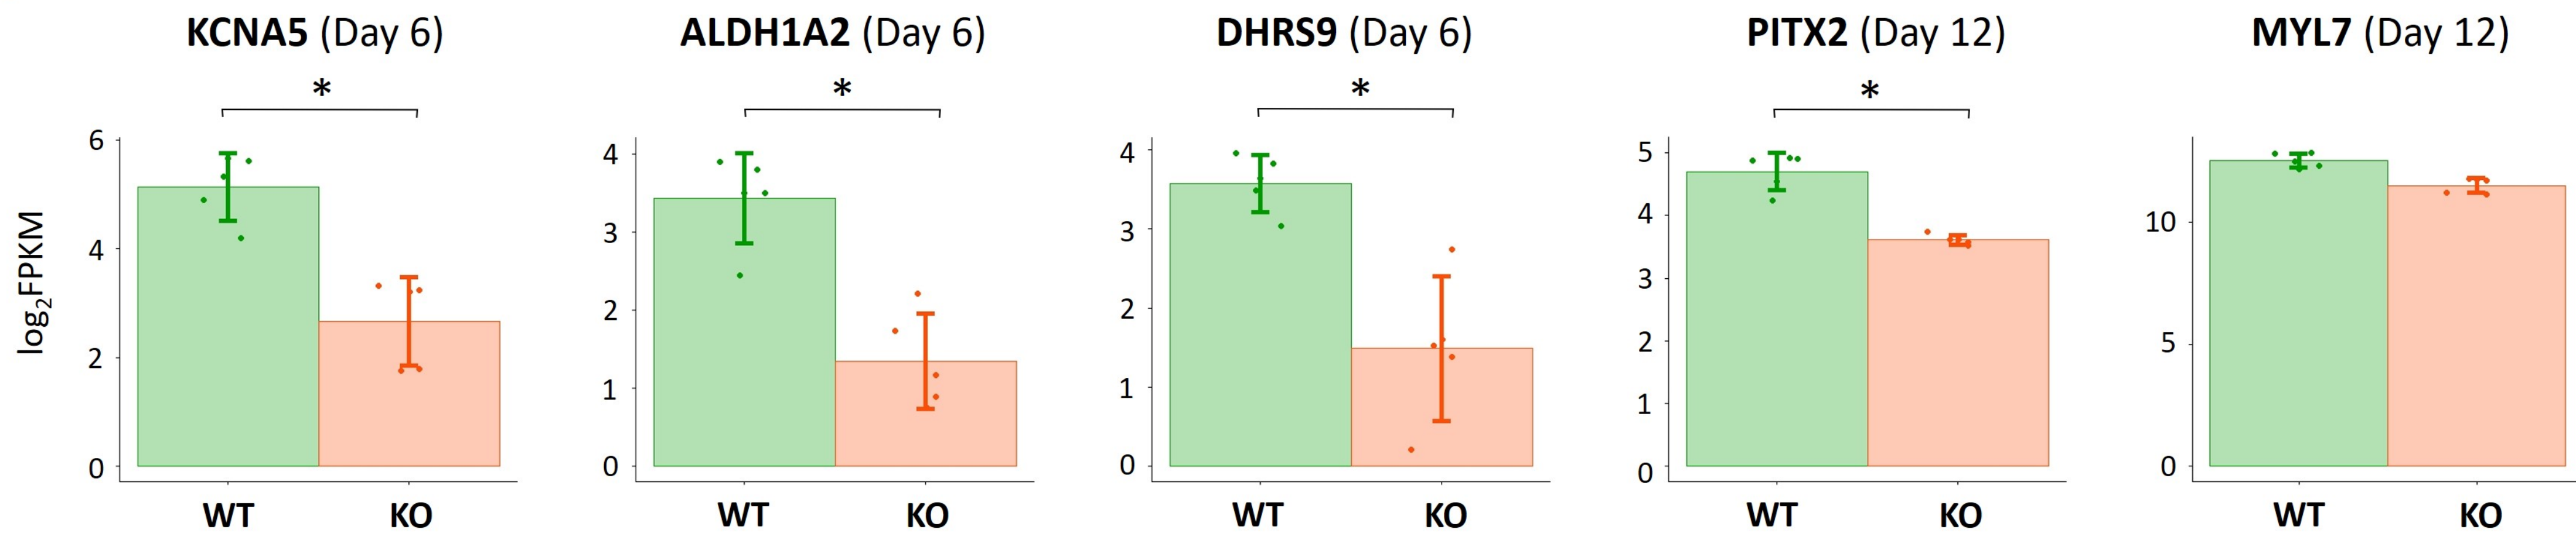**C**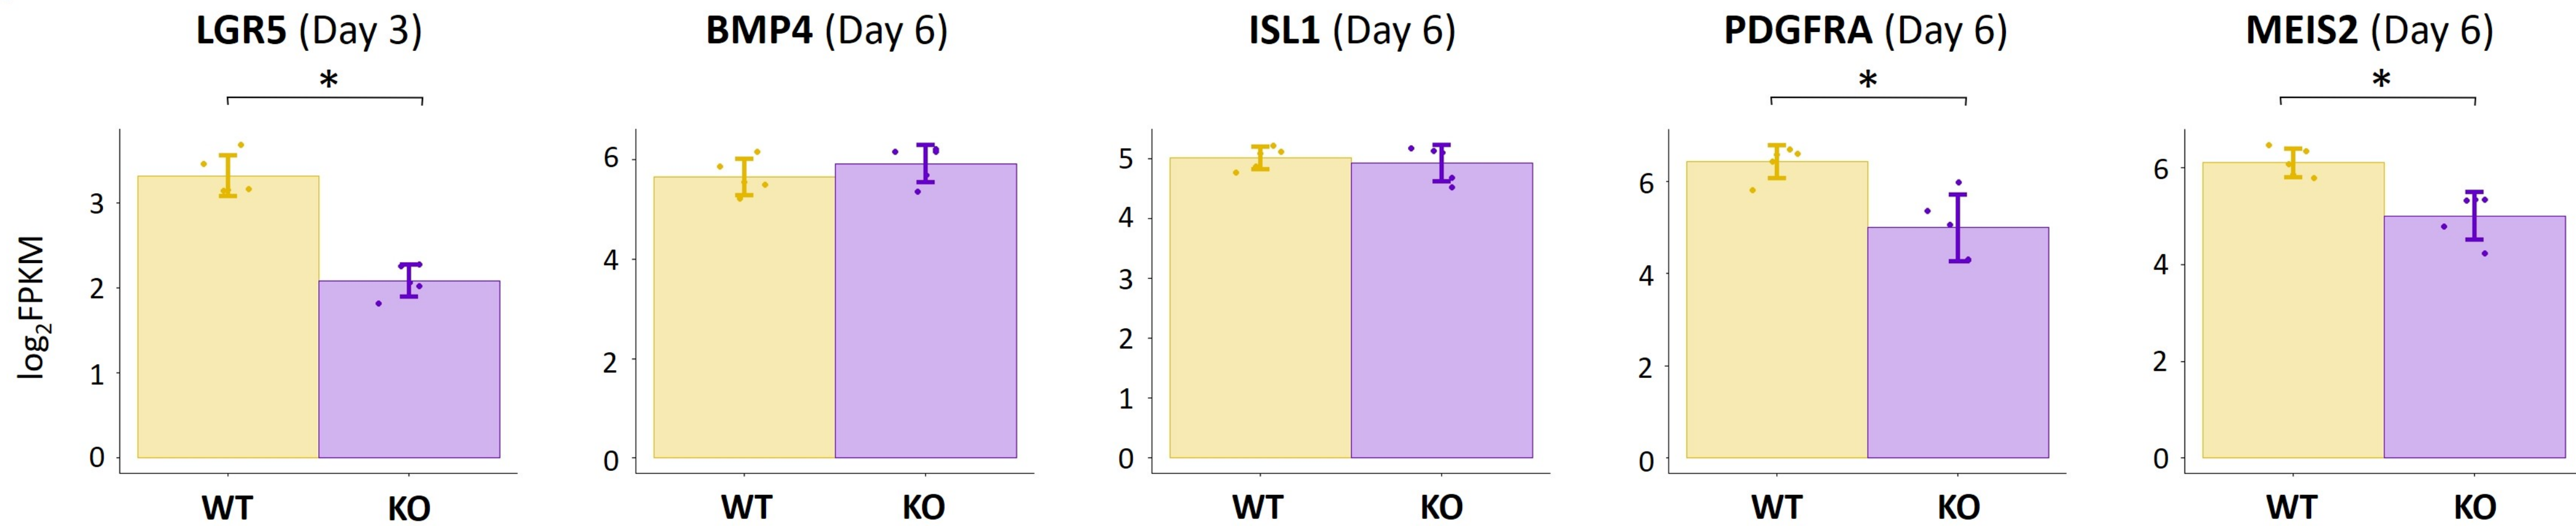**Figure S7**



68 **Figure S7. Comparison of population RNA-seq data between WT and *STRA6*-KO cells during**  
69 **CM differentiation.**

70 Comparison of gene expression of cardiac maturation markers (A), atrial CM markers (B), and SHF  
71 markers (C) in population RNA-seq data between WT and *STRA6*-KO cells during CM differentiation.

72 \* $P < 0.05$ . Differences between groups were examined with Student's *t*-test.

73

74

**A**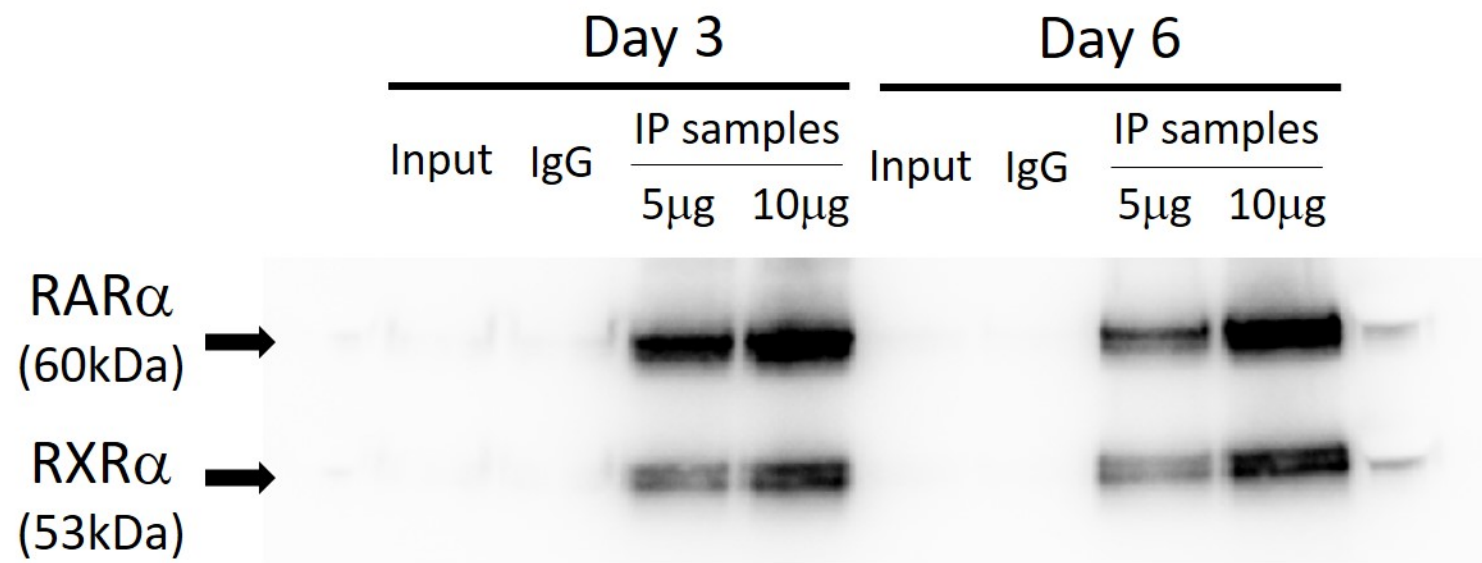**B**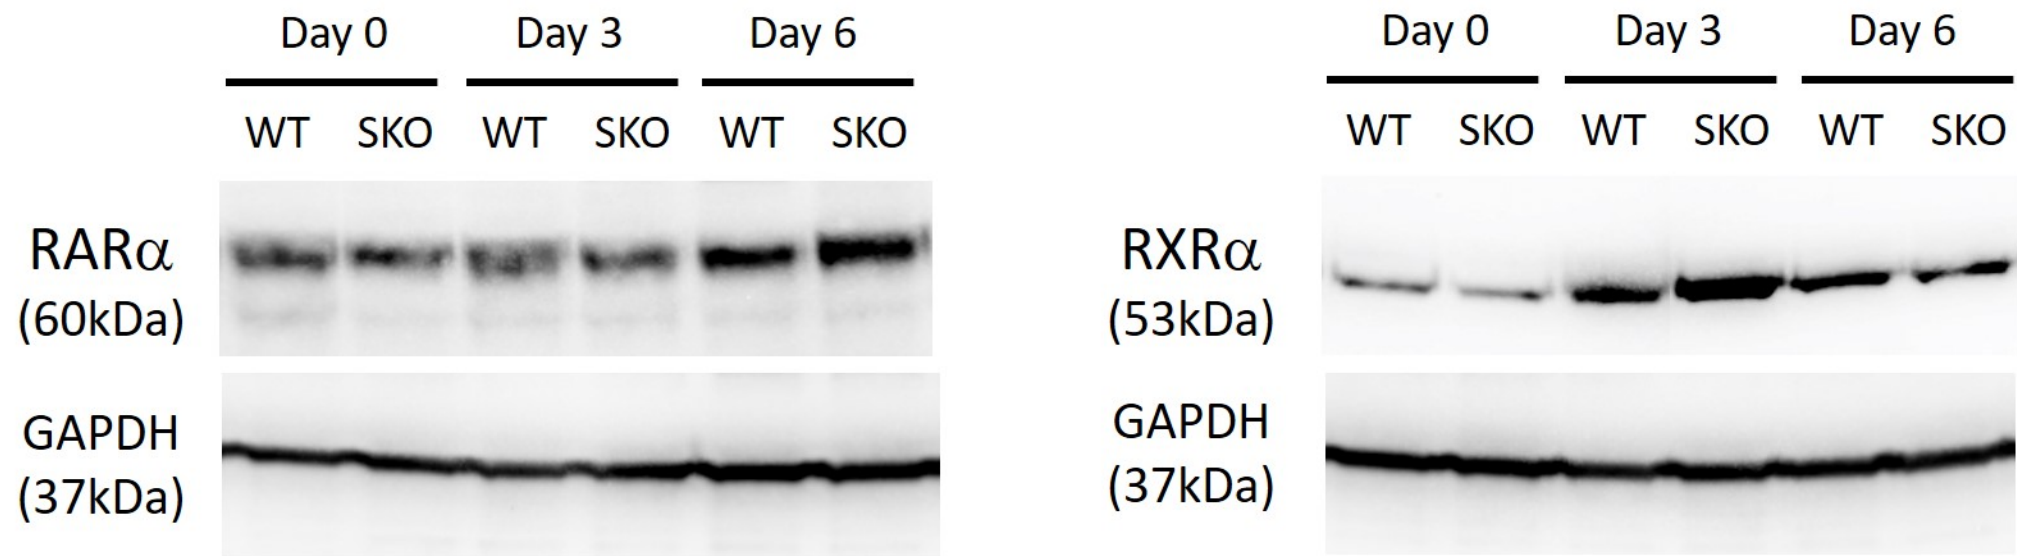**Figure S8**

75 **Figure S8. Immunoblotting and immunoprecipitation for RAR $\alpha$  and RXR $\alpha$ .**

76 (A) Western blotting analysis showing successful and specific protein immunoprecipitation by anti-  
77 RAR $\alpha$  and anti-RXR $\alpha$  antibodies using extracts derived from WT hESC-derived cells on days 3 and  
78 6 in CM differentiation in the ChIP assays. IP, immunoprecipitation. Both input samples without IP  
79 and normal IgG-immunoprecipitated samples were used as negative controls. (B) Comparison of  
80 expression of RAR $\alpha$  and RXR $\alpha$  proteins between WT and *STRA6*-KO (SKO) cells at days 0, 3 and 6  
81 in hESC-CM differentiation. No significant differences were observed between the two lines. GAPDH  
82 was used as a loading control.

83

84



Relative Expression 0  Max

**TBX1**

**ALDH1A2**

**RDH10**

**HOXB2**

t-SNE2

t-SNE1

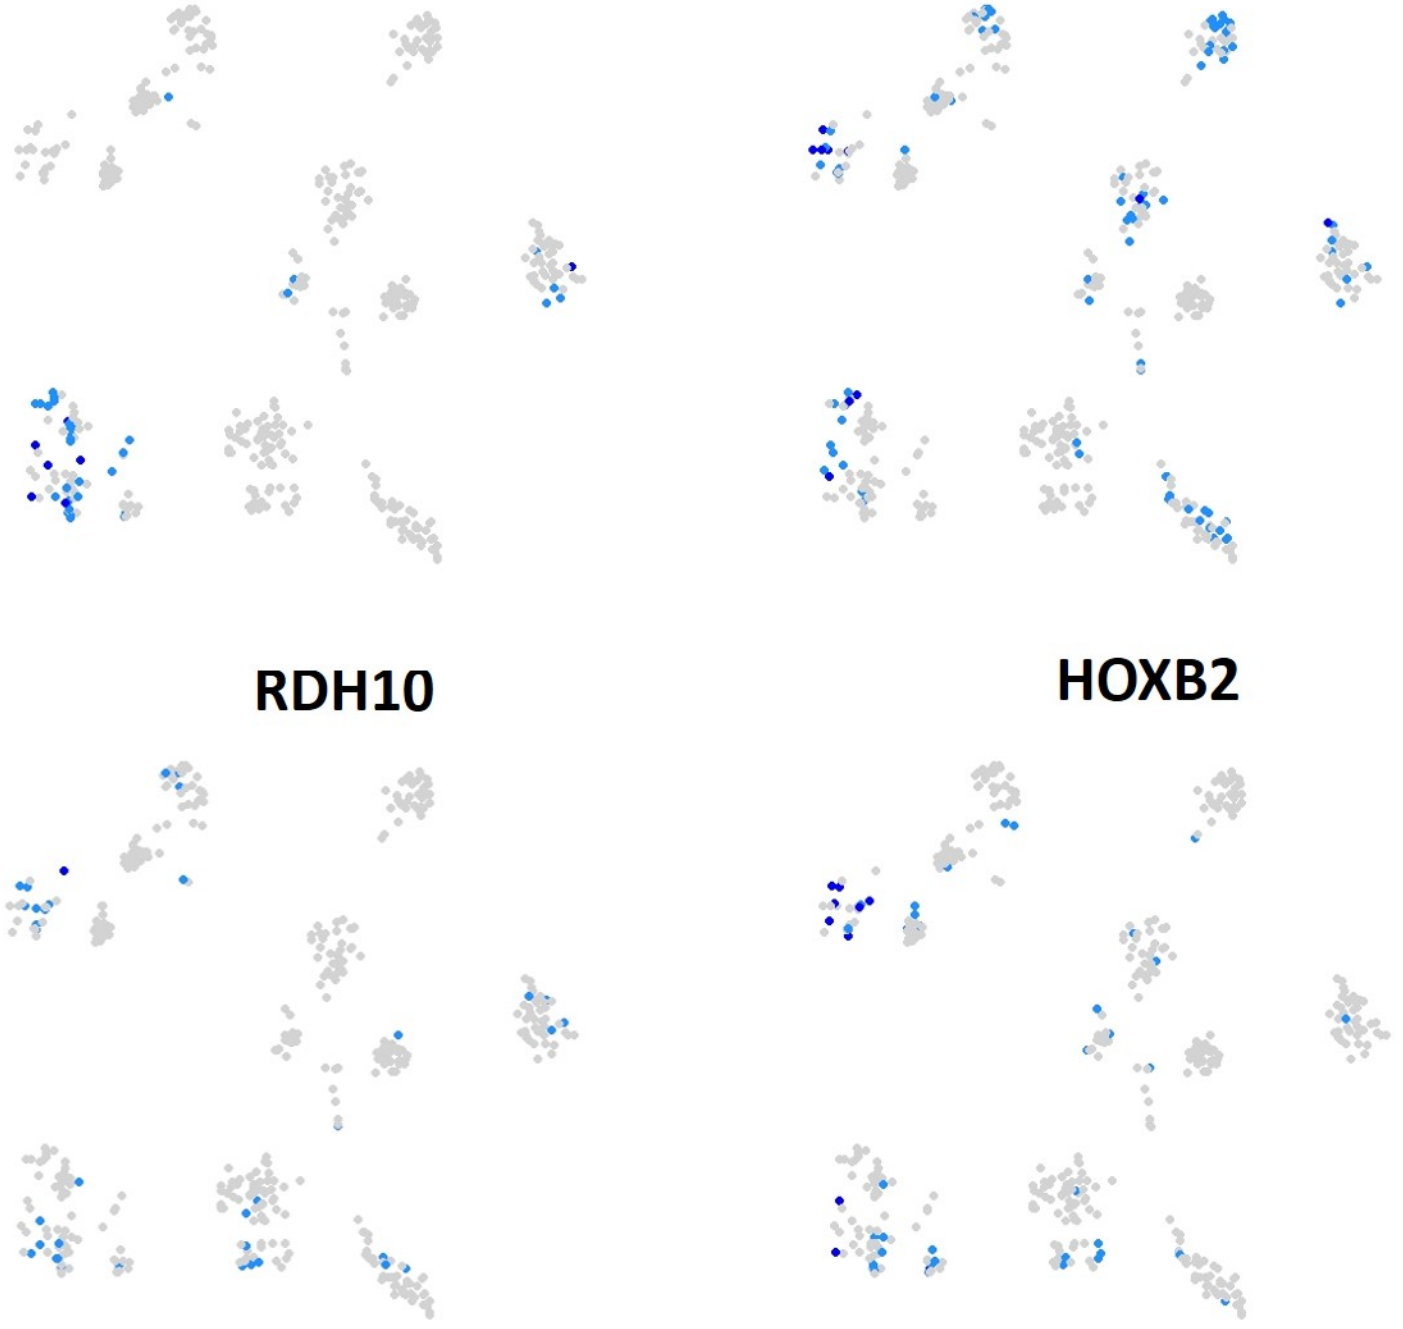

**Figure S9**

85 **Figure S9. Expression patterns of TBX1 and other RA signaling genes in human embryonic heart**  
86 **cells.**

87 Feature plots of *TBX1* and other RA signaling genes on the tSNE plots derived from single-cell RNA-  
88 seq data of human embryonic hearts (Figure 1A) are shown.

89

90

**A****Human TBX1 promoter region**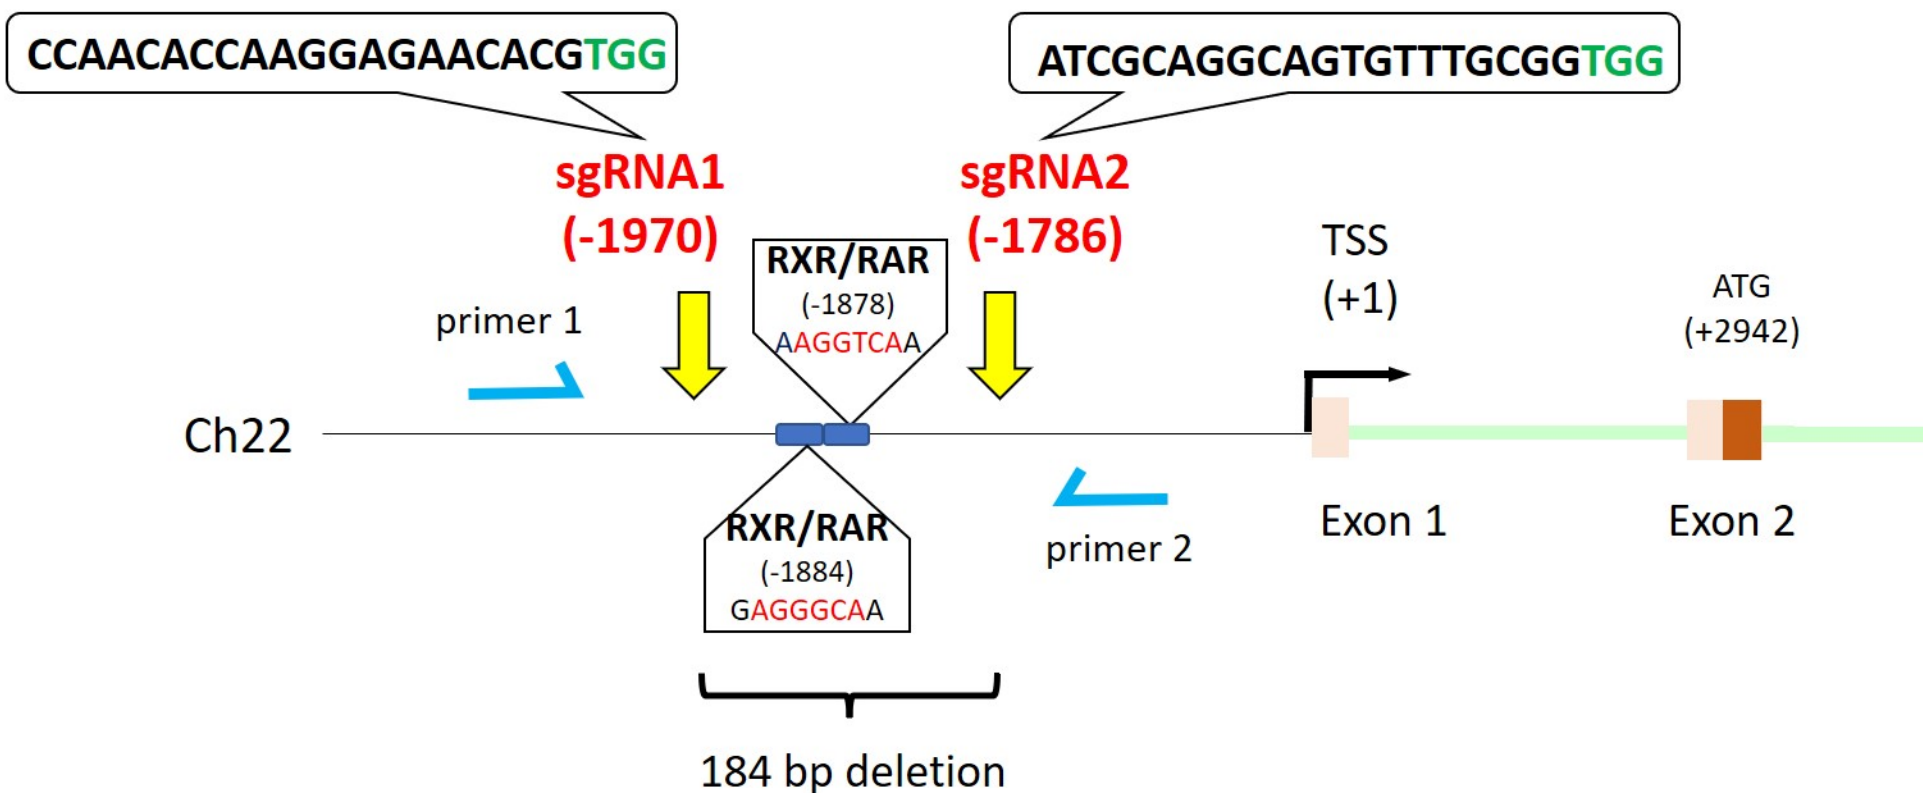**B**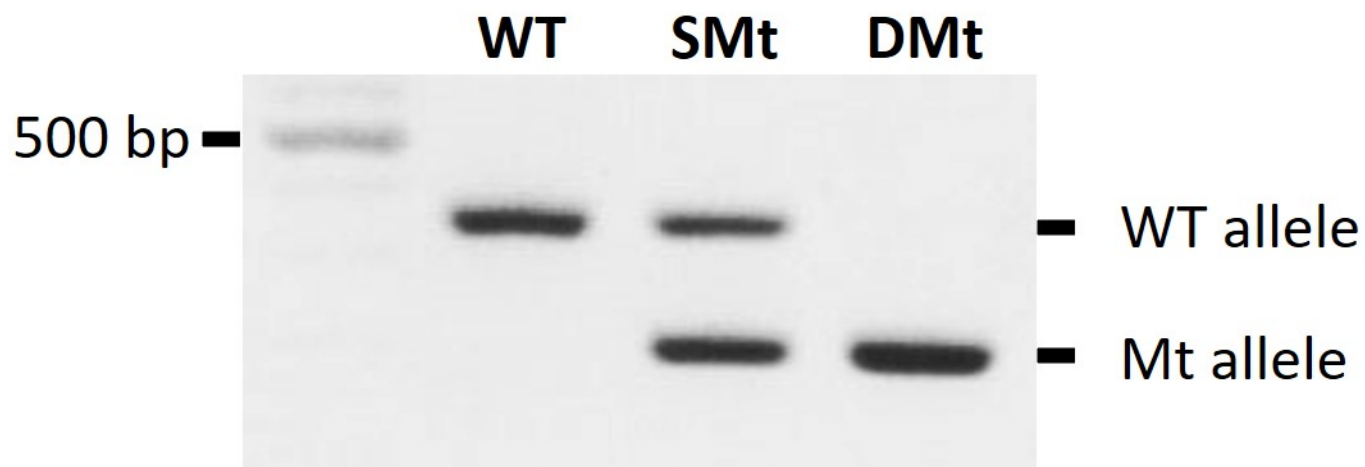**Figure S10**



91 **Figure S10. Generation of the *TBX1* promoter-mutant hESC line by CRISPR-Cas9.**

92 (A) Schema showing the strategy for deletion of a specific region (containing the identified RARE site  
93 at -1,884-1,873 bp) of 1,953-1,769 bp upstream from the transcription start site (TSS) of the human  
94 *TBX1* gene using the two sgRNAs and CRISPR-Cas9. (B) Genotyping of the transduced hESC clones  
95 showing single allele-mutant (SMt) and double allele-mutant (DMt) clones.

96

97

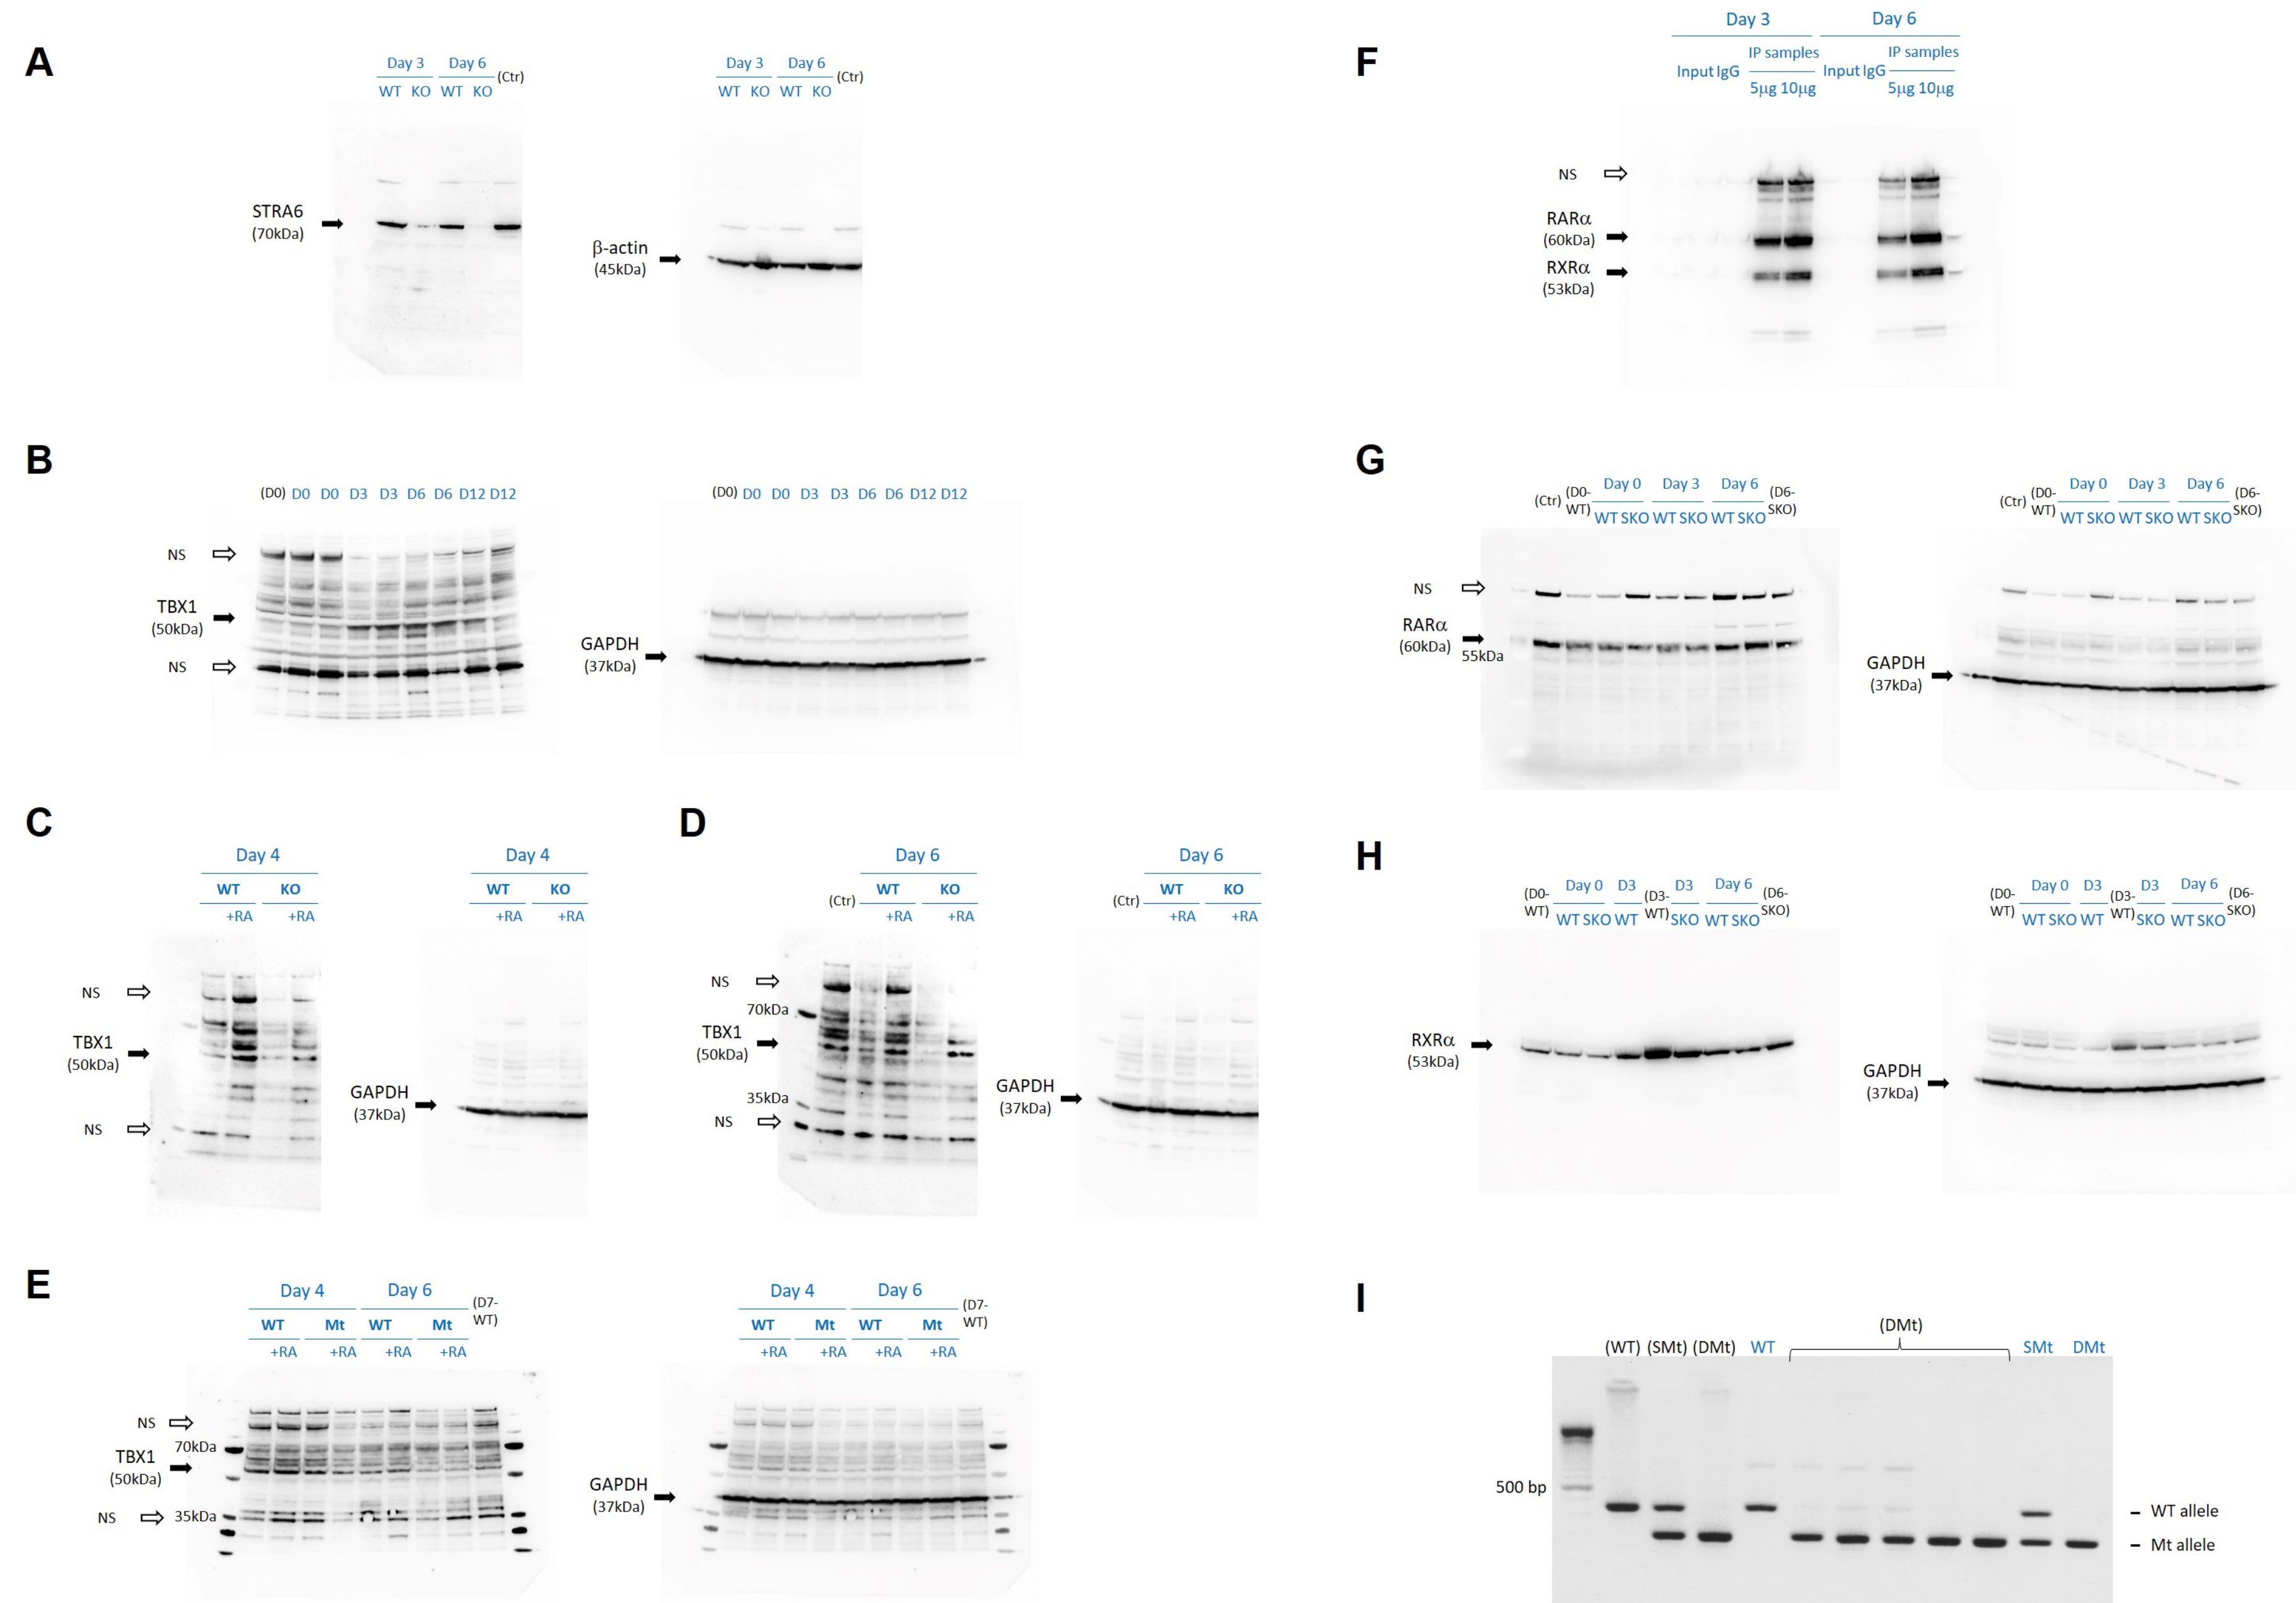

**Figure S11**

98 **Figure S11. Images of the complete unedited gels.**

99 Images of the complete unedited gels for each representative cropped gel within the text and figures  
100 are shown. (A) is for Figure 3C; (B) for Figure 6E; (C) for Figure 6G, *left* (Day 4); (D) for Figure 6G,  
101 *right* (Day 6); (E) for Figure 6I; (F) for Figure S8A; (G) for Figure S8B, *left* (RAR $\alpha$ ); (H) Figure S8B,  
102 *right* (RXR $\alpha$ ); and (I) for Figure S10B. The lanes corresponding with the lanes shown in the cropped  
103 gels presented within the text and figures are highlighted in blue color. Ctr, control; D, day; NS, not  
104 specific. Other abbreviations are same as those described in each of the figure legends, respectively.

105

106

**Table S1. Primary antibodies used for immunostaining, flow cytometry, western blotting and ChIP experiments.**

| <b>Primary Antibody</b> | <b>Purpose</b>                     | <b>Company</b>            | <b>Catalog Number</b> | <b>Dilution</b> |
|-------------------------|------------------------------------|---------------------------|-----------------------|-----------------|
| $\alpha$ -SMA           | Immunostaining                     | Sigma-Aldrich             | A2547                 | 1:400           |
| $\beta$ -actin-HRP      | Western blotting                   | Cell Signaling Technology | 5125S                 | 1:2000          |
| CDH5                    | Immunostaining                     | R&D                       | AF938                 | 1:100           |
| GAPDH-HRP               | Western blotting                   | Cell Signaling Technology | 8884S                 | 1:2000          |
| ISL1                    | Immunostaining                     | DSHB                      | 39.4D5                | 1:20            |
| ISL1-PE                 | Flow cytometry                     | BD Biosciences            | 562747                | 1:100           |
| Ki67-FITC               | Flow cytometry                     | BD Biosciences            | 556026                | 1:20            |
| PDGFRB-PE               | Flow cytometry                     | BD Biosciences            | 558821                | 1:100           |
| RAR $\alpha$            | Western blotting<br>ChIP           | Cell Signaling Technology | 62294S                | 1:1000<br>1:50  |
| RXR $\alpha$            | Western blotting<br>ChIP           | Cell Signaling Technology | 3085S                 | 1:1000<br>1:50  |
| SM22                    | Immunostaining<br>Flow cytometry   | Abcam                     | 10135                 | 1:100<br>1:100  |
| STRA6                   | Immunostaining                     | Thermo Fisher Scientific  | MA5-24206             | 1:40            |
| STRA6                   | Flow cytometry<br>Western blotting | Novus                     | NBP1-83719            | 1:100<br>1:1000 |
| TBX1                    | Western blotting                   | Abcam                     | ab18530               | 1:1000          |
| TNNT2                   | Immunostaining                     | Thermo Fisher Scientific  | MS-295-P1             | 1:100           |
| TNNT2-APC               | Flow cytometry                     | Miltenyi Biotec           | MB-130-120-403        | 1:100           |

\*ChIP, chromatin immunoprecipitation



**Table S2. Primers for quantitative PCR.**

| <b>Gene</b> | <b>Forward primer</b>   | <b>Reverse primer</b>    |
|-------------|-------------------------|--------------------------|
| ACTA1       | GAGGTATCCTGACCCTGAAGTA  | AAGCTCGTTGTAGAAGGTGTG    |
| ALDH1A2     | GCAGGTCACTGCACAATA      | CTCCTCCCTTTATCCCCTTTTC   |
| GAPDH       | GGTGTGAACCATGAGAAGTATGA | GAGTCCTTCCACGATACCAAAG   |
| GBX2        | AAGGGAAAGACGAGTCAAAGG   | CAGATTGTCATCCGAGCTGTAG   |
| HOXA1       | CAGAGGGTAGCCTTGATTTGT   | GGGTAGAGATTGGGAAAGACTTAG |
| MEOX1       | GCCCATCATAACTACCTGACTC  | CCACTTCATCCTTCGGTTCT     |
| MSX1        | CAGAAGCAGTACCTGTCCATC   | CTCTGCCTCTTGTAGTCTCTTTG  |
| MSX2        | CAGTACTCCTGCTCTGCTAAC   | CCTCCGCCTACAGAACAAT      |
| MYH9        | CGGACCTTCCACATCTTCTATT  | TTGGACAGGAAGCGGTATTT     |
| MYOCD       | GAACTCCTGGACGTGCTTATT   | CGGGAAGATCTGGGTATCTTTG   |
| MYOD1       | CCGCTTTCCTTAACCACAAATC  | CCGGCTGTAGATAGCAAAGT     |
| OSR1        | CGGAACAAGATCCGGATTGA    | CTGAAGGAAGGAGTAGTTGGTG   |
| PECAM1      | GCAACACAGTCCAGATAGTCGT  | GACCTCAAACCTGGGCATCAT    |
| SMAD3       | CCTGAGTGAAGATGGAGAAACC  | GGCTGCAGGTCCAAGTTATTA    |
| SNAI1       | CAGCTATTTTCAGCCTCCTGTT  | CCGACAAGTGACAGCCATTA     |
| SNAI2       | CTCTCTCCTCTTTCCGGATACT  | GCTTGGACTGTAGTCTTTCCTC   |
| SOX7        | CCACGTACTACAACAGCTACAG  | CACTCAAGGCACAAGAAGGA     |
| SOX9        | TGACCTATCCAAGCGCATTAC   | GCTTGCTCTGAAGAGGGTTTA    |
| SOX10       | AGCCCTCAGGACCCTATTAT    | TCAGAGATGGCCGTGTAGA      |
| SOX17       | CAACTATCCTGACGTGTGACAG  | ACCCAGGAGTCTGAGGATTT     |
| STRA6       | GAACCTCCTTTGCAGGAAGAA   | GAGTGTAGATGCAGTGTCTCAAG  |
| TAGLN       | GCATCTCGGGCTTGTATGT     | CTCCTGTTCTATGGCCTGTTT    |
| TBX1        | CGACAACGGCCACATTATTC    | CTCGGCATATTTCTCGCTATCT   |
| TGFB1       | CGTGGAGCTGTACCAGAAATAC  | CACAACTCCGGTGACATCAA     |
| TWIST1      | AGACTCTGGAGCTGGATAACT   | GCCTGTCTCGCTTCTCTTT      |
| TWIST2      | GGATGCATTCGAGTCTGTAAC   | TCACTGCTGTCCCTTCTCT      |
| ZIC1        | GAGCGACAAGCCCTATCTTT    | GGATTCGTGGACCTTCATGT     |

**Table S3. List of the WT or STRA6-KO hESC-derived cardiac differentiating cells-enriched genes.**

| Day 3        |          |          |                    |          |          | Day 6              |          |          |                  |          |          | Day 12        |          |          |                  |          |          |
|--------------|----------|----------|--------------------|----------|----------|--------------------|----------|----------|------------------|----------|----------|---------------|----------|----------|------------------|----------|----------|
| WT-enriched  |          |          | KO-enriched        |          |          | WT-enriched        |          |          | KO-enriched      |          |          | WT-enriched   |          |          | KO-enriched      |          |          |
| Gene         | LogFC    | P-Value  | Gene               | LogFC    | P-Value  | Gene               | LogFC    | P-Value  | Gene             | LogFC    | P-Value  | Gene          | LogFC    | P-Value  | Gene             | LogFC    | P-Value  |
| FOXI2        | 1.58659  | 0.001406 | NDUFA4<br>L2       | 2.180206 | 0.000151 | SLC17A8            | 2.489139 | 0.007724 | MYOF             | 1.138333 | 0.002015 | ACTA1         | 3.422072 | 2.59E-06 | FUT3             | 2.813608 | 1.42E-08 |
| SCGB1A1      | 1.584444 | 0.026857 | PPFIA4             | 1.934361 | 0.000244 | ALDH1A<br>2        | 1.772209 | 0.008103 | S100A10          | 1.027926 | 0.006054 | TNC           | 2.370876 | 1.10E-07 | RPS10-<br>NUDT3  | 2.682573 | 2.06E-05 |
| T            | 1.520559 | 0.023925 | PFKFB4             | 1.811499 | 0.015405 | HOXA1              | 1.484818 | 0.009704 | MIR4258          | 0.933979 | 5.69E-05 | TAGLN         | 2.217828 | 7.62E-05 | TTR              | 2.28234  | 0.003869 |
| TCTEX1<br>D1 | 1.491943 | 0.009059 | RP11-<br>867G2.6   | 1.751092 | 0.009245 | TLX1               | 1.462542 | 0.000122 | NMRK2            | 0.927364 | 0.006566 | ACTA2         | 2.055195 | 4.83E-08 | LINC0136<br>3    | 2.240982 | 3.37E-08 |
| SPOCK3       | 1.441055 | 0.000887 | ASB5               | 1.74784  | 0.023841 | CD82               | 1.381355 | 0.007394 | CTC-<br>550B14.7 | 0.908251 | 0.025001 | TUBA1A        | 2.039319 | 1.40E-07 | TFPI2            | 2.170877 | 2.00E-07 |
| ODC1         | 1.336316 | 0.013048 | SLC5A9             | 1.73966  | 0.017605 | MT-TF              | 1.236286 | 0.039769 | RP11-<br>85G21.3 | 0.877808 | 0.029693 | CNTN5         | 2.018824 | 8.46E-07 | OR7E13P          | 2.163981 | 2.13E-07 |
| DAND5        | 1.27011  | 0.009416 | PDE4C              | 1.619249 | 0.000172 | RP11-<br>834C11.4  | 1.227464 | 0.001566 | RP11-<br>3B12.5  | 0.811728 | 0.021532 | PSMD5-<br>AS1 | 2.01764  | 0.000113 | CDKN1A           | 2.152777 | 1.03E-05 |
| CYP24A1      | 1.266689 | 0.01746  | LINC0110<br>8      | 1.594633 | 0.001568 | LIX1               | 1.211157 | 0.012443 | MIR6807          | 0.805    | 0.010954 | MFS1          | 1.955004 | 1.67E-06 | ACTN3            | 2.131987 | 5.32E-09 |
| SPP1         | 1.209422 | 0.005319 | RP11-<br>277P12.10 | 1.533453 | 0.003682 | TBX1               | 1.202287 | 0.000166 | EEF1A2           | 0.792517 | 0.024609 | DHFR          | 1.916338 | 6.11E-09 | CTC-<br>435M10.3 | 2.083333 | 0.028099 |
| TPPP3        | 1.208138 | 0.010226 | RP11-<br>267L5.1   | 1.493404 | 0.00134  | RPL17-<br>C18orf32 | 1.177467 | 0.008447 | DKK3             | 0.791302 | 0.01333  | DHCR24        | 1.893371 | 4.11E-06 | TCTEX1<br>D1     | 2.044006 | 1.03E-05 |
| FOX1         | 1.170805 | 0.007798 | ARHGAP<br>40       | 1.485715 | 0.015093 | HEY1               | 1.165475 | 0.032891 | SNORD83<br>A     | 0.774298 | 0.0061   | ITGB1BP<br>2  | 1.884873 | 5.40E-07 | FHL2             | 1.992818 | 4.50E-05 |
| TBX1         | 1.133627 | 0.018656 | STC1               | 1.483094 | 0.009369 | HOTAIR<br>M1       | 1.154114 | 0.020935 | RP11-<br>85G21.2 | 0.733372 | 0.003657 | SEC11C        | 1.87952  | 2.31E-05 | ABRA             | 1.962749 | 1.38E-07 |

|                      |          |          |                     |          |          |                       |          |          |                   |          |          |                     |          |          |                     |          |          |
|----------------------|----------|----------|---------------------|----------|----------|-----------------------|----------|----------|-------------------|----------|----------|---------------------|----------|----------|---------------------|----------|----------|
| <b>HLA-B</b>         | 1.131302 | 0.011665 | <b>UPK1A-AS1</b>    | 1.469999 | 0.000437 | <b>NTRK2</b>          | 1.061248 | 0.000135 | <b>LINC01108</b>  | 0.723574 | 0.00992  | <b>RP3-527G5.1</b>  | 1.879332 | 0.000112 | <b>MAOA</b>         | 1.935368 | 3.47E-06 |
| <b>PKIB</b>          | 1.123184 | 0.000245 | <b>TRDN</b>         | 1.459467 | 0.000806 | <b>PRRX2</b>          | 1.058239 | 0.023134 | <b>ALPK3</b>      | 0.715868 | 0.005649 | <b>TCTA</b>         | 1.878493 | 1.95E-07 | <b>HIST1H2AC</b>    | 1.92615  | 5.97E-05 |
| <b>EFCAB1</b>        | 1.117372 | 0.002412 | <b>LINC00458</b>    | 1.428268 | 0.005421 | <b>LINC01088</b>      | 1.046111 | 0.016419 | <b>S100A4</b>     | 0.7068   | 0.000426 | <b>ACAT2</b>        | 1.759467 | 1.14E-05 | <b>RASL12</b>       | 1.916309 | 8.30E-08 |
| <b>DRC1</b>          | 1.099608 | 0.021664 | <b>RP3-467D16.3</b> | 1.404839 | 0.027403 | <b>AKR1B15</b>        | 1.029897 | 0.036643 | <b>CIART</b>      | 0.680766 | 0.009608 | <b>MYL9</b>         | 1.759126 | 7.88E-08 | <b>MT-TF</b>        | 1.867579 | 1.53E-05 |
| <b>RHBDL3</b>        | 1.084739 | 0.01247  | <b>LINC00467</b>    | 1.38738  | 0.000173 | <b>RP11-83C7.1</b>    | 1.013563 | 0.000495 | <b>DNAJC15</b>    | 0.674475 | 0.026851 | <b>MT-CYB</b>       | 1.745065 | 2.23E-08 | <b>RP11-92G12.3</b> | 1.823371 | 3.95E-06 |
| <b>MAATSI</b>        | 1.047167 | 0.009769 | <b>SLC2A14</b>      | 1.379912 | 0.000243 | <b>PSMD5</b>          | 0.985662 | 0.000777 | <b>NPY</b>        | 0.668566 | 0.00121  | <b>PLEKHA6</b>      | 1.734593 | 1.15E-06 | <b>PTAR1</b>        | 1.799045 | 1.12E-06 |
| <b>MAPK15</b>        | 1.032567 | 0.01583  | <b>NDRG1</b>        | 1.377136 | 0.01435  | <b>GPC5-AS1</b>       | 0.981817 | 0.001329 | <b>GJA4</b>       | 0.663096 | 0.040048 | <b>PLAT</b>         | 1.733906 | 4.31E-06 | <b>EIF4EBP3</b>     | 1.771148 | 1.37E-07 |
| <b>PSMD5</b>         | 1.030543 | 0.000683 | <b>CBRI</b>         | 1.372808 | 0.012481 | <b>SMOC1</b>          | 0.980258 | 0.024766 | <b>SNORD12B</b>   | 0.658472 | 0.022009 | <b>PSMB9</b>        | 1.705744 | 3.47E-06 | <b>PLCXD3</b>       | 1.766715 | 3.86E-08 |
| <b>PKD1L1</b>        | 1.006605 | 5.96E-05 | <b>CIART</b>        | 1.36779  | 0.001368 | <b>NETO1</b>          | 0.979023 | 0.043757 | <b>ZNF639</b>     | 0.64847  | 0.000604 | <b>TP53I3</b>       | 1.701381 | 5.52E-07 | <b>RRAD</b>         | 1.742327 | 0.002225 |
| <b>RP5-857K21.11</b> | 1.006279 | 0.000513 | <b>SNORD3B-2</b>    | 1.367004 | 0.014866 | <b>PLSCR5</b>         | 0.97635  | 0.00465  | <b>MYLPF</b>      | 0.647004 | 0.00593  | <b>MIR3164</b>      | 1.659417 | 0.000311 | <b>N4BP2L1</b>      | 1.708203 | 4.32E-06 |
| <b>PROM1</b>         | 0.996095 | 0.042432 | <b>SNORA40</b>      | 1.331588 | 0.02007  | <b>CDH11</b>          | 0.967371 | 0.005443 | <b>NPAS4</b>      | 0.630915 | 0.003993 | <b>HNRNPM</b>       | 1.646681 | 7.92E-07 | <b>GRK5</b>         | 1.695051 | 1.32E-06 |
| <b>FAM198B</b>       | 0.994072 | 8.49E-05 | <b>AC114803.3</b>   | 1.324886 | 0.000773 | <b>PRAC2</b>          | 0.963295 | 0.009642 | <b>SLC2A3</b>     | 0.620196 | 0.007562 | <b>PDLIM7</b>       | 1.64576  | 6.80E-07 | <b>RP11-329B9.5</b> | 1.687963 | 4.00E-07 |
| <b>COL2A1</b>        | 0.986222 | 0.029423 | <b>AC073071.1</b>   | 1.317158 | 0.007534 | <b>SPOCK3</b>         | 0.962089 | 0.02158  | <b>CDH2</b>       | 0.613895 | 0.019435 | <b>OSR1</b>         | 1.64331  | 4.91E-05 | <b>ATP1A2</b>       | 1.663465 | 1.49E-05 |
| <b>CAPN9</b>         | 0.978742 | 0.002829 | <b>CXADRP3</b>      | 1.293753 | 0.000392 | <b>SIAH3</b>          | 0.95431  | 0.024425 | <b>EFNA1</b>      | 0.611829 | 0.00015  | <b>RP1-178F15.5</b> | 1.641372 | 0.020513 | <b>APOA2</b>        | 1.662661 | 0.002025 |
| <b>NRGN</b>          | 0.975037 | 0.012822 | <b>CD1D</b>         | 1.29024  | 3.31E-05 | <b>RP11-977G19.10</b> | 0.920858 | 0.034262 | <b>ZNF790-AS1</b> | 0.609137 | 0.01816  | <b>MT-TE</b>        | 1.62826  | 5.57E-05 | <b>HSPB2</b>        | 1.648072 | 1.00E-05 |

|                 |          |          |               |          |          |             |          |          |            |          |          |          |          |          |                |          |          |
|-----------------|----------|----------|---------------|----------|----------|-------------|----------|----------|------------|----------|----------|----------|----------|----------|----------------|----------|----------|
| RP11-288A5.2    | 0.958572 | 0.004562 | PCDHGA11      | 1.280523 | 0.004407 | SFRP5       | 0.89715  | 0.018115 | LMO2       | 0.606244 | 0.010626 | FUS      | 1.60938  | 2.08E-08 | HIST1H2BD      | 1.599789 | 1.78E-05 |
| RNASEK-C17orf49 | 0.939627 | 0.035178 | CPSF1P1       | 1.270932 | 0.038796 | FOXQ1       | 0.890868 | 0.008105 | PTRF       | 0.603363 | 0.026123 | ACTB     | 1.590282 | 8.86E-07 | RP11-554A11.9  | 1.595001 | 2.28E-05 |
| PSMD5-AS1       | 0.938317 | 0.002317 | RP11-798M19.6 | 1.270861 | 0.02176  | ODAM        | 0.888141 | 0.018192 | TCEA3      | 0.602361 | 0.039492 | SNORD14E | 1.582465 | 0.005872 | UHMK1          | 1.546295 | 1.16E-06 |
| NECAB2          | 0.934283 | 0.003449 | SLC16A3       | 1.270071 | 0.002357 | CCBE1       | 0.885653 | 0.01433  | SLC2A14    | 0.601362 | 0.013866 | SNORD3A  | 1.554207 | 0.003548 | PPP2R2B        | 1.542573 | 1.54E-05 |
| MIR6891         | 0.929836 | 0.007355 | FGF11         | 1.269209 | 0.000251 | DNAH2       | 0.877608 | 0.047051 | AL450992.2 | 0.596637 | 0.047558 | FAM198B  | 1.523851 | 1.53E-06 | CCDC169-SOHLH2 | 1.541899 | 0.047632 |
| EML1            | 0.923097 | 0.018499 | ABHD12B       | 1.23171  | 0.00616  | DACH1       | 0.873065 | 0.01442  | MIR548AR   | 0.591832 | 0.014087 | ANAPC15  | 1.522927 | 2.45E-05 | UQCRB          | 1.539928 | 3.17E-05 |
| TMEM132E        | 0.918854 | 0.043029 | SNRPCP6       | 1.211533 | 0.029072 | RDH10       | 0.872685 | 0.003099 | MIR22HG    | 0.574452 | 0.03793  | AMH      | 1.521821 | 0.004841 | AEN            | 1.53152  | 4.21E-07 |
| SNORA73B        | 0.917148 | 0.009006 | FAM162A       | 1.201268 | 0.000887 | STRA6       | 0.870875 | 0.002111 | PCGF5      | 0.571868 | 0.031644 | TSPAN32  | 1.516628 | 6.64E-05 | DDB2           | 1.528912 | 1.07E-05 |
| RSPO3           | 0.914009 | 0.028405 | ENO2          | 1.197504 | 0.000123 | H2AFJ       | 0.86952  | 0.002651 | LHFP       | 0.566689 | 0.00858  | RAB15    | 1.508047 | 3.73E-07 | RP11-247A12.2  | 1.52776  | 1.63E-06 |
| SEMA3D          | 0.910333 | 0.003391 | PLOD2         | 1.195219 | 0.001622 | ATF7IP2     | 0.850974 | 0.018994 | PRKAB2     | 0.554618 | 0.030902 | MTG1     | 1.507459 | 1.75E-05 | RP11-329B9.4   | 1.501472 | 4.07E-07 |
| SNORD14A        | 0.902251 | 0.008353 | RP11-69I8.2   | 1.174344 | 0.004625 | HOXB3       | 0.85044  | 0.032274 | HNF4G      | 0.547617 | 0.035243 | SNORD59A | 1.492518 | 0.000132 | SNORD117       | 1.488355 | 2.58E-05 |
| RP5-857K21.7    | 0.899592 | 0.007195 | RP11-11N5.1   | 1.170709 | 0.000657 | AP000275.65 | 0.840401 | 0.0055   | MUC1       | 0.543098 | 0.001035 | SLC38A7  | 1.490785 | 4.83E-08 | EDA2R          | 1.472469 | 2.64E-06 |
| RIPPLY3         | 0.891378 | 0.00106  | TRAJ49        | 1.17039  | 0.033628 | AMIGO2      | 0.839739 | 0.016493 | NOVA1-AS1  | 0.541099 | 0.012004 | AQP10    | 1.477695 | 2.45E-06 | MYCN           | 1.472433 | 7.10E-05 |
| WDR4            | 0.878018 | 0.002876 | GATA6-AS1     | 1.156625 | 0.010571 | IRX5        | 0.828052 | 0.027786 | GSAP       | 0.526816 | 0.014557 | SNF8     | 1.473856 | 1.28E-07 | RAB25          | 1.465996 | 0.001674 |

|               |          |          |              |          |          |               |          |          |              |          |          |           |          |          |               |          |          |
|---------------|----------|----------|--------------|----------|----------|---------------|----------|----------|--------------|----------|----------|-----------|----------|----------|---------------|----------|----------|
| ADAM28        | 0.876713 | 0.006642 | BNIP3        | 1.156506 | 0.003112 | PTGIS         | 0.824327 | 0.003635 | MIR6895      | 0.526785 | 0.0461   | ID4       | 1.46873  | 1.82E-07 | TUNAR         | 1.463695 | 1.99E-07 |
| NXPB2         | 0.868348 | 0.01836  | SLC2A3       | 1.153905 | 0.000121 | RALYL         | 0.82263  | 0.000749 | YBX2         | 0.526728 | 0.041365 | SLC1A4    | 1.466856 | 1.50E-06 | ADIRF-ASI     | 1.458832 | 1.13E-05 |
| C6orf118      | 0.859067 | 0.030385 | C1orf61      | 1.151595 | 0.003507 | AKRIC2        | 0.821443 | 0.015897 | RWDD2B       | 0.517697 | 0.0084   | SCUBE3    | 1.451726 | 3.34E-07 | RASGRP1       | 1.444618 | 2.71E-06 |
| FBLN7         | 0.851673 | 0.008889 | RP1-90G24.10 | 1.149408 | 0.04807  | DUSP9         | 0.818199 | 0.014819 | CCDC141      | 0.514778 | 0.019694 | GATA2-AS1 | 1.445647 | 1.01E-05 | MT-TV         | 1.438587 | 1.75E-05 |
| SPAG1         | 0.83473  | 0.031528 | SMIM24       | 1.144495 | 0.000234 | FRMD6         | 0.81017  | 0.033337 | SNORD99      | 0.502714 | 0.017291 | PIK3R3    | 1.424291 | 2.50E-06 | ZMAT3         | 1.424797 | 5.19E-05 |
| NDUFC2-KCTD14 | 0.830991 | 0.0364   | U4           | 1.135268 | 0.006053 | MAB21L2       | 0.804035 | 0.016229 | CD99         | 0.500044 | 0.014185 | RSPO4     | 1.421908 | 1.68E-05 | ILDR2         | 1.409243 | 3.19E-05 |
| CA2           | 0.822652 | 0.003406 | MIR367       | 1.113387 | 0.041393 | RP11-49K24.6  | 0.802626 | 0.007797 | RCAN2        | 0.497535 | 0.04516  | LANCL2    | 1.414772 | 4.08E-06 | RP11-8P13.5   | 1.408134 | 2.35E-06 |
| MUC4          | 0.81073  | 0.018031 | P4HA1        | 1.100413 | 0.017835 | NHS           | 0.798489 | 0.015824 | LINC00240    | 0.482317 | 0.030562 | FREM2     | 1.401502 | 3.65E-06 | GSI-259H13.2  | 1.407049 | 9.13E-06 |
| SOX9          | 0.809694 | 0.022351 | BEX5         | 1.09986  | 0.000119 | METTL7A       | 0.795872 | 0.047098 | C18orf32     | 0.477445 | 0.007915 | LSS       | 1.382376 | 3.73E-06 | ECHDC2        | 1.403317 | 1.73E-05 |
| CFAP45        | 0.807239 | 0.033233 | SPAG4        | 1.099522 | 2.15E-05 | STAR          | 0.792425 | 0.021895 | RNVU1-3      | 0.463262 | 0.021473 | NCOA5     | 1.373497 | 1.42E-06 | PPP1R1B       | 1.387096 | 4.75E-07 |
| AC078794.1    | 0.805336 | 0.000342 | NANOGP1      | 1.096679 | 0.014329 | RP11-834C11.7 | 0.784289 | 0.000827 | RP4-798A10.4 | 0.461741 | 0.032443 | ARSA      | 1.360578 | 0.000119 | HIST1H1C      | 1.383838 | 0.000184 |
| HSPH1         | 0.804621 | 0.025073 | SERPINB9     | 1.08722  | 0.017694 | RPS10-NUDT3   | 0.784203 | 0.003976 | PEX19        | 0.461252 | 0.001169 | MSRA      | 1.353167 | 4.11E-05 | MT-TR         | 1.381308 | 0.000266 |
| SPAG6         | 0.798377 | 0.040106 | RP11-184E9.4 | 1.060541 | 0.044608 | HOXB2         | 0.783865 | 0.023985 | NOL4         | 0.460432 | 0.017121 | GPC5-AS1  | 1.351155 | 8.79E-07 | RP1-28O10.1   | 1.379122 | 0.000688 |
| HMX1          | 0.797392 | 0.006513 | BNIP3P1      | 1.05514  | 0.003274 | TBX5-AS1      | 0.783065 | 0.028811 | IQCA1        | 0.458246 | 0.028814 | MIR324    | 1.347615 | 1.67E-05 | RP11-441O15.3 | 1.378592 | 3.90E-08 |
| HAPLN3        | 0.796928 | 0.038102 | POTEC        | 1.051358 | 9.56E-05 | HOXB4         | 0.7816   | 0.046904 | SLFN13       | 0.457759 | 0.00563  | TFRC      | 1.342488 | 4.23E-05 | MIR548AR      | 1.377964 | 0.000126 |
| C4orf48       | 0.788533 | 0.035137 | RFPL2        | 1.04924  | 0.031842 | FZD10-        | 0.779527 | 0.017791 | PPP1R9A      | 0.457737 | 0.021655 | CKMT1B    | 1.336781 | 3.70E-07 | GDF15         | 1.363598 | 0.000147 |



|                 |          |          |                      |          |          |                           |          |          |                         |          |          |                   |          |          |                     |          |          |
|-----------------|----------|----------|----------------------|----------|----------|---------------------------|----------|----------|-------------------------|----------|----------|-------------------|----------|----------|---------------------|----------|----------|
|                 |          |          |                      |          |          | <b>AS1</b>                |          |          |                         |          |          |                   |          |          |                     |          |          |
| <b>ADAT1</b>    | 0.787525 | 0.030488 | <b>CD177</b>         | 1.044634 | 0.028673 | <b>SPON1</b>              | 0.772356 | 0.035079 | <b>ARHGAP23</b>         | 0.452733 | 0.00574  | <b>ABCA8</b>      | 1.336568 | 1.67E-07 | <b>RASGEF1A</b>     | 1.358106 | 2.61E-07 |
| <b>C3orf14</b>  | 0.786821 | 0.017817 | <b>RP11-3B12.3</b>   | 1.039449 | 0.042985 | <b>RP11-442N1.1</b>       | 0.757447 | 0.029956 | <b>XXbac-B444P24.13</b> | 0.451398 | 0.018132 | <b>PEPD</b>       | 1.331514 | 2.00E-06 | <b>TSPO</b>         | 1.353401 | 2.56E-05 |
| <b>ARL4A</b>    | 0.783169 | 0.033948 | <b>SLC2A1</b>        | 1.035614 | 0.037573 | <b>CTB-12O2.1</b>         | 0.754541 | 0.037338 | <b>SLC25A44</b>         | 0.450667 | 0.01492  | <b>NPPB</b>       | 1.31084  | 6.72E-05 | <b>NTRK3</b>        | 1.352481 | 5.82E-07 |
| <b>RRS1</b>     | 0.780458 | 0.022598 | <b>MIR302B</b>       | 1.035282 | 0.0402   | <b>MMP2</b>               | 0.742353 | 0.02766  | <b>ZNF761</b>           | 0.449211 | 0.036758 | <b>RN7SL493P</b>  | 1.306376 | 0.007528 | <b>MTHFD2</b>       | 1.351219 | 1.07E-06 |
| <b>C9orf117</b> | 0.779384 | 0.024393 | <b>ZNF578</b>        | 1.035125 | 0.000679 | <b>MCTS2P</b>             | 0.731664 | 0.001806 | <b>TSPAN7</b>           | 0.449074 | 0.040484 | <b>ATP6V0D1</b>   | 1.305305 | 3.33E-07 | <b>CCND2</b>        | 1.349951 | 1.10E-06 |
| <b>RARRES2</b>  | 0.777041 | 0.038486 | <b>CTD-2562J17.6</b> | 1.022022 | 0.025082 | <b>MIR573</b>             | 0.724791 | 0.010094 | <b>CDH5</b>             | 0.44682  | 0.003379 | <b>MAMDC4</b>     | 1.3043   | 0.000422 | <b>GNG11</b>        | 1.34432  | 1.64E-06 |
| <b>CTPS1</b>    | 0.773968 | 0.015896 | <b>NOL3</b>          | 1.018167 | 0.002292 | <b>RP11-256I9.3</b>       | 0.719387 | 0.009773 | <b>SHTN1</b>            | 0.445798 | 0.006995 | <b>PFKFB3</b>     | 1.299574 | 3.17E-06 | <b>DENND1C</b>      | 1.341472 | 5.88E-07 |
| <b>ADAM11</b>   | 0.772143 | 0.047904 | <b>NLGN4X</b>        | 1.00331  | 0.03009  | <b>BOC</b>                | 0.705537 | 0.023004 | <b>TRIB1</b>            | 0.44449  | 0.002972 | <b>REC8</b>       | 1.298826 | 9.35E-07 | <b>LYZL4</b>        | 1.341245 | 1.89E-05 |
| <b>NKAIN1</b>   | 0.769874 | 0.005472 | <b>PGK1</b>          | 1.000818 | 0.000244 | <b>CACNG4</b>             | 0.701992 | 0.016553 | <b>ZNF717</b>           | 0.443544 | 0.007462 | <b>HSD17B10</b>   | 1.296281 | 3.78E-06 | <b>RP11-329B9.3</b> | 1.336528 | 1.14E-06 |
| <b>ALKBH3</b>   | 0.765659 | 0.002851 | <b>WNT8A</b>         | 0.992221 | 0.043485 | <b>CSNK2B-LY6G5B-1181</b> | 0.700101 | 0.048522 | <b>SLC35A3</b>          | 0.440486 | 0.001243 | <b>ZNF503-AS2</b> | 1.294322 | 1.73E-05 | <b>AC226119.5</b>   | 1.329527 | 4.33E-06 |
| <b>TBX5</b>     | 0.762626 | 0.006389 | <b>CTC-550B14.7</b>  | 0.9777   | 0.001864 | <b>SNORA11</b>            | 0.692829 | 0.01421  | <b>SLC40A1</b>          | 0.440309 | 0.042167 | <b>LY6G5B</b>     | 1.291238 | 5.10E-06 | <b>SLCIA5</b>       | 1.321215 | 9.58E-07 |
| <b>MIR4292</b>  | 0.76199  | 0.000239 | <b>RP11-348J12.5</b> | 0.975964 | 0.014574 | <b>LRP11</b>              | 0.692081 | 0.005941 | <b>PSKH2</b>            | 0.438644 | 0.018166 | <b>TPCN2</b>      | 1.290751 | 2.24E-05 | <b>CD9</b>          | 1.318586 | 0.000142 |
| <b>NAP1L3</b>   | 0.756914 | 0.003139 | <b>ACTN3</b>         | 0.967153 | 0.005276 | <b>RP11-86K22.2</b>       | 0.688879 | 0.032785 | <b>ENOX2</b>            | 0.437906 | 0.007701 | <b>PHYHD1</b>     | 1.278421 | 2.88E-06 | <b>CAPN3</b>        | 1.315468 | 2.19E-05 |

|             |          |          |               |          |          |                |          |          |               |          |          |             |          |          |               |          |          |
|-------------|----------|----------|---------------|----------|----------|----------------|----------|----------|---------------|----------|----------|-------------|----------|----------|---------------|----------|----------|
| NKAIN4      | 0.756646 | 0.031747 | SH3D21        | 0.95889  | 3.06E-05 | MEIS1-AS3      | 0.684327 | 0.026692 | ZSCAN1        | 0.434358 | 0.011236 | TAP1        | 1.278048 | 3.90E-05 | RP11-676J15.1 | 1.314574 | 0.000144 |
| SPA17       | 0.754885 | 0.005188 | RP11-20D14.6  | 0.954109 | 0.009321 | DLEU1_1        | 0.680974 | 0.019468 | TSEN15        | 0.433912 | 0.029918 | ARHGAP1     | 1.276275 | 1.22E-05 | ANGPT1        | 1.313351 | 1.06E-06 |
| MOXD1       | 0.753571 | 0.042558 | RP11-415G4.1  | 0.951174 | 0.002502 | NFKBIZ         | 0.678584 | 0.025922 | PIP5K1A       | 0.430578 | 0.002203 | SIRPA       | 1.273966 | 2.60E-06 | FAM19A4       | 1.312446 | 6.17E-05 |
| HMGCS1      | 0.749984 | 0.020773 | CYP2S1        | 0.949591 | 0.001929 | NMNAT3         | 0.676265 | 0.00206  | NQO1          | 0.427485 | 0.04383  | CYP26A1     | 1.272864 | 0.001457 | PRKX          | 1.310364 | 1.36E-05 |
| COL26A1     | 0.743912 | 0.045183 | ERVH48-1      | 0.947671 | 0.014667 | APOLD1         | 0.670478 | 0.026877 | TUFT1         | 0.420933 | 0.015918 | MIR22HG     | 1.269574 | 2.21E-05 | ELL2          | 1.303662 | 5.92E-07 |
| SNORA65     | 0.74197  | 0.033764 | C3            | 0.947065 | 0.001776 | TMEM132E       | 0.666563 | 0.01687  | A2M           | 0.417064 | 0.041543 | TLX1        | 1.265343 | 7.96E-07 | SPATA18       | 1.302339 | 5.20E-06 |
| VWCE        | 0.739461 | 0.005978 | CTD-2265O21.3 | 0.939329 | 0.000289 | PITX2          | 0.660524 | 0.004469 | TINAGL1       | 0.415807 | 0.020473 | COMMD4      | 1.26182  | 2.12E-05 | AC024592.12   | 1.299241 | 0.006951 |
| UHRF1       | 0.732354 | 0.044181 | RP11-11N5.3   | 0.92939  | 0.004843 | CCDC3          | 0.650629 | 0.038242 | AC010329.1    | 0.415535 | 0.024283 | LINC00982   | 1.260686 | 1.55E-05 | KCNIP2        | 1.298186 | 2.74E-05 |
| SQLE        | 0.73197  | 0.014479 | RP11-240B13.2 | 0.924836 | 0.004411 | KAZALD1        | 0.650522 | 0.0055   | MNS1          | 0.415046 | 0.007172 | TMEM26      | 1.258106 | 3.22E-06 | GAS5          | 1.276671 | 1.69E-06 |
| CENPV       | 0.730553 | 0.005074 | CTD-2306M5.1  | 0.920631 | 0.034244 | RBM14-RBM4     | 0.648373 | 0.012348 | RNF115        | 0.412793 | 0.013452 | CRELD2      | 1.257898 | 9.96E-07 | BTG3          | 1.276489 | 3.77E-07 |
| RP3-467L1.6 | 0.726311 | 0.000309 | MIR210HG      | 0.896773 | 0.003375 | RP11-1099M24.6 | 0.64698  | 0.03869  | VPS72         | 0.412637 | 0.020623 | CKMT1A      | 1.257545 | 3.15E-06 | LDB2          | 1.273284 | 0.000215 |
| SNORA13     | 0.725034 | 0.032634 | MAGEA4        | 0.89596  | 0.004508 | PSMD5-AS1      | 0.64564  | 0.009451 | RP11-567G11.1 | 0.412517 | 0.01438  | CCNL2       | 1.251516 | 9.05E-05 | TNFRSF10C     | 1.269653 | 8.55E-05 |
| ERICH6-AS1  | 0.721158 | 0.032666 | MID2          | 0.893486 | 0.009924 | PDGFRB         | 0.644915 | 0.008671 | ZDHHC23       | 0.412116 | 0.038767 | RP11-2C24.9 | 1.248104 | 0.000433 | CRHR1         | 1.263378 | 5.06E-07 |
| TIGAR       | 0.719863 | 0.025721 | PMF1-BGLAP    | 0.891609 | 0.02083  | EBF4           | 0.64424  | 0.00553  | SPRY2         | 0.405827 | 0.039791 | MIR210HG    | 1.243419 | 7.25E-06 | KTN1-AS1      | 1.24802  | 1.06E-05 |

|                       |          |          |                      |          |          |                      |          |          |                     |          |          |                      |          |          |                     |          |          |
|-----------------------|----------|----------|----------------------|----------|----------|----------------------|----------|----------|---------------------|----------|----------|----------------------|----------|----------|---------------------|----------|----------|
| <b>RNU2-2P</b>        | 0.715812 | 0.041311 | <b>RP11-268J15.5</b> | 0.886311 | 0.000162 | <b>SPX</b>           | 0.642386 | 0.007041 | <b>MATR3</b>        | 0.404518 | 0.011478 | <b>TM7SF2</b>        | 1.241359 | 1.01E-06 | <b>GRIN2A</b>       | 1.245362 | 1.57E-07 |
| <b>CCDC40</b>         | 0.715441 | 0.00433  | <b>LRRC3-AS1</b>     | 0.881634 | 0.025035 | <b>TFPI</b>          | 0.635801 | 0.019927 | <b>UCHL5</b>        | 0.403497 | 0.023078 | <b>NPHP3-ACAD11</b>  | 1.241077 | 0.004073 | <b>SGIP1</b>        | 1.242653 | 2.40E-05 |
| <b>CTD-2514C3.1</b>   | 0.714719 | 0.020678 | <b>FAR2P2</b>        | 0.877466 | 0.010349 | <b>LINC00890</b>     | 0.635113 | 0.038268 | <b>GABRP</b>        | 0.40277  | 0.009521 | <b>LIMD2</b>         | 1.23632  | 4.23E-07 | <b>VAMP5</b>        | 1.237747 | 1.28E-07 |
| <b>BZW1</b>           | 0.711334 | 0.000623 | <b>PDK1</b>          | 0.874705 | 0.003509 | <b>LRRC4</b>         | 0.633744 | 0.014347 | <b>OIT3</b>         | 0.401206 | 0.031433 | <b>ACOX2</b>         | 1.232091 | 7.47E-06 | <b>GSDMB</b>        | 1.235726 | 6.35E-05 |
| <b>RP11-395A13.2</b>  | 0.710271 | 0.033118 | <b>VLDLR</b>         | 0.869468 | 0.007004 | <b>SCARNA22</b>      | 0.630718 | 0.005435 | <b>MIR6747</b>      | 0.400051 | 0.029911 | <b>ALOX15</b>        | 1.230301 | 0.000354 | <b>ZNF121</b>       | 1.234388 | 3.10E-06 |
| <b>RP11-216L13.19</b> | 0.707229 | 0.003417 | <b>COL11A1</b>       | 0.869251 | 0.007409 | <b>ANKRD19P</b>      | 0.629662 | 0.034434 | <b>ZNF808</b>       | 0.395084 | 0.004098 | <b>INHA</b>          | 1.229246 | 8.88E-07 | <b>BBC3</b>         | 1.228464 | 8.61E-06 |
| <b>SAMHD1</b>         | 0.706262 | 0.001503 | <b>HHLA1</b>         | 0.867535 | 0.021694 | <b>RP11-676J15.1</b> | 0.621875 | 0.017492 | <b>ITGA6</b>        | 0.394791 | 0.033502 | <b>IDUA</b>          | 1.229158 | 3.47E-05 | <b>DES</b>          | 1.228267 | 4.25E-05 |
| <b>CHAC2</b>          | 0.70417  | 0.031886 | <b>PLA2G2A</b>       | 0.866339 | 0.003125 | <b>AC144522.1</b>    | 0.619949 | 0.02361  | <b>MAP3K13</b>      | 0.3943   | 0.009719 | <b>TNNC1</b>         | 1.228866 | 5.72E-06 | <b>CMBL</b>         | 1.223211 | 3.58E-06 |
| <b>PSPC1</b>          | 0.701789 | 0.024502 | <b>P4HA2</b>         | 0.853711 | 0.002803 | <b>CHURC1-FNTB</b>   | 0.615064 | 0.006269 | <b>SNORD15B</b>     | 0.393318 | 0.01738  | <b>RP11-561B11.2</b> | 1.227745 | 0.047779 | <b>PTTG1</b>        | 1.222107 | 4.59E-05 |
| <b>MAPK4</b>          | 0.701252 | 0.022459 | <b>HTR2C</b>         | 0.851316 | 0.001547 | <b>AL139396.1</b>    | 0.613555 | 0.007233 | <b>PCDHGA11</b>     | 0.391366 | 0.021706 | <b>GOLGA8A</b>       | 1.227246 | 0.000162 | <b>NPY</b>          | 1.220218 | 0.000502 |
| <b>PTPN13</b>         | 0.699427 | 0.013581 | <b>B3GNT4</b>        | 0.850521 | 0.000559 | <b>WDR86</b>         | 0.611399 | 0.027764 | <b>RNU2-17P</b>     | 0.389702 | 0.049405 | <b>DERL3</b>         | 1.225865 | 2.43E-07 | <b>ENG</b>          | 1.219737 | 2.92E-06 |
| <b>PRIMA1</b>         | 0.699118 | 0.042757 | <b>AP000688.29</b>   | 0.848654 | 0.008386 | <b>SYT10</b>         | 0.606774 | 0.019161 | <b>TNFSF9</b>       | 0.389609 | 0.013215 | <b>HCN3</b>          | 1.217335 | 2.17E-05 | <b>HMGCLL1</b>      | 1.218629 | 3.03E-05 |
| <b>SNORD30</b>        | 0.696473 | 0.044789 | <b>APOBEC3G</b>      | 0.84849  | 0.006357 | <b>GAS2L3</b>        | 0.60656  | 0.019589 | <b>RP11-20D14.6</b> | 0.389138 | 0.015528 | <b>KCNG1</b>         | 1.217183 | 7.93E-05 | <b>ICAM5</b>        | 1.212151 | 0.000326 |
| <b>TRIM17</b>         | 0.695994 | 0.044652 | <b>RP4-590F24.2</b>  | 0.847759 | 0.006862 | <b>ISYNA1</b>        | 0.605315 | 0.006386 | <b>RNU6-945P</b>    | 0.38409  | 0.022636 | <b>GATA2</b>         | 1.212061 | 0.000284 | <b>CTB-151G24.1</b> | 1.211156 | 3.46E-06 |
| <b>SLC7A2</b>         | 0.694159 | 0.04997  | <b>RP5-</b>          | 0.845184 | 0.005658 | <b>CMC1</b>          | 0.60418  | 0.005875 | <b>CERS2</b>        | 0.381491 | 0.04019  | <b>PTOV1-</b>        | 1.212034 | 0.000161 | <b>SNHG16</b>       | 1.210769 | 3.57E-06 |

|               |         |          |                       |          |          |                             |          |          |                                |          |          |            |          |          |             |          |          |
|---------------|---------|----------|-----------------------|----------|----------|-----------------------------|----------|----------|--------------------------------|----------|----------|------------|----------|----------|-------------|----------|----------|
|               |         |          | <b>1061H20.4</b>      |          |          |                             |          |          |                                |          |          | <b>AS2</b> |          |          |             |          |          |
| <b>ARRDC3</b> | 0.69206 | 0.035924 | <b>AC078941</b><br>.1 | 0.841532 | 0.000236 | <b>RNA5SP3</b><br><b>83</b> | 0.603713 | 0.016564 | <b>RP11-</b><br><b>26212.2</b> | 0.381456 | 0.021025 | <b>ADM</b> | 1.206802 | 0.001365 | <b>NOBI</b> | 1.209647 | 3.25E-07 |
